## Trends in Prescription Fills for Blood Pressure-Elevating and Antihypertensive Medications, 2017–2023

Ashutosh Kumar<sup>a,b</sup>, PhD, MS MS

Nicole L. Therrien<sup>a</sup>, PharmD, MPH

John I. Ogwuegbu<sup>a,c</sup>, PharmD, MA

Jun Soo Lee<sup>a</sup>, PhD

Hilary K. Wall<sup>a</sup>, MPH

John M. Flack<sup>d</sup>, MD MPH

Sandra L. Jackson<sup>a</sup>, PhD, MPH

### Affiliations:

<sup>a</sup> Division for Heart Disease and Stroke Prevention (DHDSPP), National Center for Chronic Disease Prevention and Health Promotion (NCCDPHP), Centers for Disease Control and Prevention (CDC), Atlanta, GA, USA

<sup>b</sup> The Bizzell Group, New Carrollton, MD, USA

<sup>c</sup> Oak Ridge Institute for Science and Education (ORISE), Oak Ridge, TN, USA

<sup>d</sup> Professor and Chair, Department of Internal Medicine, Southern Illinois University School of Medicine, Springfield, IL, USA

Corresponding author: Sandra L. Jackson; Chamblee 107, 4770 Buford Highway NE, Atlanta, GA 30341, USA; Office: +1 770-488-4221; [icl1@cdc.gov](mailto:icl1@cdc.gov)

Financial Disclosures: None

Disclaimer: The findings and conclusions in this study are those of the authors and do not necessarily represent the official position of the Centers for Disease Control and Prevention (CDC).

Tables and Figures: ≤5 (Currently the document has 2 Tables, 2 Figures in paper; and 7 Supplementary Tables for online-only supplement)

Word Count: 6110 (including title page, abstract, tables, and references)

**Acknowledgements:**

This study was reviewed by the Centers for Disease Control and Prevention and conducted consistent with applicable federal law and the Centers for Disease Control and Prevention policy (5 C.F.R. part 46, 21 C.F.R. part 56; 42 U.S.C. Sect. 241(d); 5 U. S.C. Sect. 552a; 44 U.S.C. Sect. 3501 et seq.).

## Abstract (247 words)

**Background:** Many medications can have blood pressure (BP)-elevating effects, which might negatively impact BP control among persons with hypertension. This study examines trends in prescription fills for BP-elevating and antihypertensive medications, individually and concurrently, among US individuals.

**Methods:** Quarterly trends of concurrent and individual fills for BP-elevating and antihypertensive medications were reported using the national sample from IQVIA's Total Patient Tracker database, covering 94% of all retail prescription fills in the US. We identified 1,387 products containing BP-elevating medications and 240 products containing antihypertensive medications. Percentage change from Q1/2017 and average quarterly percent change from Joinpoint regression were used to present trends overall and by sex and age group (0–17, 18–44, 45–64, 65–74, and  $\geq 75$  years).

**Results:** During 2017–2023, fills remained stable for BP-elevating medications alone and increased for antihypertensive medication alone (9.5% increase; from 10.1% to 11.0%;  $p < 0.001$ ). Concurrent fills for antihypertensive and BP-elevating medications increased by 15.9% (from 5.4% to 6.2%;  $p < 0.001$ ). Prescription fills for BP-elevating medications were higher among adult women compared to men; among women aged 18 to 44 years, this was primarily due to the use of combined oral contraceptives. In Q4/2023, prescription fills for BP-elevating medications were most common among those aged 65–74 years (females=30.7% vs males = 20.4%).

**Conclusions:** These results provide the first national trends in concurrent prescription fills for BP-elevating and antihypertensive medications, indicating an increasing trend. Our findings

might inform clinicians in their decision-making regarding medication selection for patients with hypertension.

## INTRODUCTION

Hypertension, or high blood pressure (BP), is one of the major modifiable risk factors for cardiovascular disease (CVD) including heart disease and stroke,<sup>1</sup> which are among the leading causes of death in the United States (US).<sup>2,3</sup> Hypertension, is a chronic medical condition that affects a significant portion of the US population.<sup>4</sup> According to 2017–20 estimates, nearly 48.1% of US adults have hypertension, of which 77.5% have uncontrolled hypertension (BP  $\geq$  130/80 mmHg).<sup>4</sup> Hypertension control is critically important as it is significantly associated with lower risks of premature heart disease mortality<sup>5,6</sup> and major acute cardiovascular events including myocardial infarction and stroke.<sup>7,8</sup>

One of the less investigated barriers in BP control is the use of medications that can raise BP levels.<sup>9,10</sup> According to the 2017 American College of Cardiology and American Heart Association Guideline,<sup>10</sup> certain prescription medications, such as amphetamines, antidepressants, non-steroidal anti-inflammatory drugs (NSAIDs), immunosuppressants, and combined oral contraceptives can raise blood pressure; use of these medications might lead to hypertension or worsening BP control among those with hypertension.<sup>9-11</sup> Concurrent use of BP-elevating medication might attenuate antihypertensive effects of antihypertensive therapy or might also lead to a change in BP from drug interactions.<sup>12</sup>

Prior studies have documented antihypertensive medication trends among the US population;<sup>13-16</sup> however, there is scarce literature on prescription fills for BP-elevating medications. One study, using the National Health and Nutrition Examination Survey (NHANES) pooled data from 2009 to 2018, found that approximately 18% of US adults with hypertension took medications that might cause elevated blood pressure.<sup>9</sup> Antidepressants,

NSAIDs, and estrogen-containing medications were the most commonly reported classes, and the use of these medications was associated with greater odds of hypertension among adults not concurrently taking antihypertensive medications. Understanding the prescription trends for concurrent BP-elevating and antihypertensive medications can provide insights into the strategies needed to improve hypertension management and control.

The primary objective of this study is to present quarterly trends of prescription fills for BP-elevating and antihypertensive medications, individually and concurrently, among US individuals from 2017 to 2023. Additionally, we present trends by sex and age groups for BP-elevating and antihypertensive medications.

## **METHOD**

### **Data**

We used IQVIA's Total Patient Tracker (TPT) database to obtain the deduplicated counts of individuals with prescription fills across the US in each quarter from Q1/2017 to Q4/2023. Covering 94% of outpatient retail prescription fills in the US, the TPT database gathers prescription information directly from sources including payers and retail pharmacies such as pharmacy chains, independent pharmacies, grocery stores, and large retail outlets. The TPT database provides nationally projected deduplicated counts of individuals with prescription fills along with 95% confidence intervals. Consistent with previous studies using TPT data, prescriptions from veterinarians, dentists, and naturopaths were excluded.<sup>17</sup>

We identified 240 products containing antihypertensive medications (referred to as antihypertensive medications) (Table S1).<sup>15</sup> For BP-elevating medications, a list of 1,387 products containing potentially BP-elevating medications (referred to as BP-elevating

medications) was generated from a search of 150 generic drug names across 11 therapeutic classes (Table S2). Included generic drug names and therapeutic classes were guided by internal authors', including pharmacists', consensus, and were based on medications with potential BP-elevating effects, mentioned in the hypertension clinical practice guideline<sup>10</sup> and a thorough review of the existing literature.<sup>9,12,18-37</sup>

The TPT database provided the overall counts of unique individuals for each quarter in three mutually exclusive groups: 1) prescription fills for BP-elevating medication alone, 2) prescription fills for antihypertensive medication alone, and 3) concurrent prescription fills for BP-elevating medication and antihypertensive medication. Concurrent prescriptions were defined if prescriptions for any of the BP-elevating and antihypertensive medications were filled in the same quarter. Furthermore, we obtained the counts of unique individuals by sex and age group for each quarter who had individual or concurrent prescription fills for any antihypertensive medication or any BP-elevating medication (i.e., non-mutually exclusive categories). To report results by sex and age group, we presented findings for a total of 10 subgroups: among males and females in 5 age ranges (0–17, 18–44, 45–64, 65–74, and  $\geq 75$  years). All data were deidentified and no institutional board approval was required.

### **Statistical analysis**

We reported deduplicated count of individuals with concurrent or individual prescription fills for BP-elevating and antihypertensive medications for each quarter from Q1/2017 to Q4/2023. We used annual US population totals from the CDC WONDER dataset provided by National Center for Health Statistics (NCHS)<sup>38</sup> for each group to report the age-specific prevalence of prescription fills in percentages, absolute (non-regression based) percent changes compared to

Q1/2017, and quarterly trends, overall and stratified by sex and age group. We used the NCHS 2022 population data for population denominators for our data in both 2022 and 2023, as NCHS population data for 2023 was not yet available. Data extraction and analysis was conducted using Microsoft Excel and Stata, version 17.0 (StataCorp).

Joinpoint regression (JoinPoint 5.1.0, National Cancer Institute, Bethesda, MD) identified statistically significant trends in population percentage from Q1/2017 to Q4/2023.<sup>39</sup> For Joinpoint regression, a permutation-based approach was adopted for all groups, and the log model with correlated errors was selected.<sup>40,41</sup> Estimates from Joinpoint regression for the population percentage with prescription fills were reported as the average quarterly percent change (AQPC) for the period Q1/2017–Q4/2023. We excluded the year 2020 in estimating trends and statistical significance from the Joinpoint regression.<sup>42</sup> Estimates and statistical significance were similar to the Joinpoint regression model with the full sample (Table S3). Furthermore, we presented absolute change for the top 20 medications within antihypertensive and BP-elevating medication groups that experienced largest increase in number of individuals with prescription fills by sex and age group from Q1/2017 to Q4/2023 (Tables S4 and S5). We also presented the list of top 20 medications with highest number of fills in Q4/2023 within antihypertensive and BP-elevating medication (Tables S6 and S7). We reported population percentage and Joinpoint results with 95% confidence intervals, and statistical significance was determined by a p-value <0.05. We followed the Strengthening the Reporting of Observational Studies in Epidemiology (STROBE) reporting guidelines.



## RESULTS

### *Overall results for concurrent and individual prescription fills.*

Prescription fills for BP-elevating medications alone remained stable from 12.5% (95% CI = 12.4% to 12.6%) (40.8 million) in Q1/2017 to 12.7% (95% CI = 12.6% to 12.8%) (42.3 million) in Q4/2023; however, prescription fills for antihypertensive medications alone and concurrent prescription fills for BP-elevating and antihypertensive medications increased during Q1/2017 to Q4/2023 (Figure 1, Tables 1 and 2). The percentage of individuals with prescription fills for antihypertensive medication alone increased from 10.1% (95% CI = 10.0% to 10.2%) (32.8 million) in Q1/2017 to 11.0% (95% CI = 10.9% to 11.1%) (36.8 million) in Q4/2023 (9.5% increase;  $p < 0.001$ ). Concurrent prescription fills for BP-elevating and antihypertensive medications increased from 5.4% (95% CI = 5.3% to 5.4%) (17.4 million) in Q1/2017 to 6.2% (95% CI = 6.1% to 6.3%) (20.7 million) in Q4/2023 (15.9% increase;  $p < 0.001$ ).

### *Prescription fills for BP-elevating medications overall and by sex and age groups*

Prescription fills for BP-elevating medications were higher among females in comparison to males for all age groups except those aged 0–17 years (Figure 1, Tables 1 and 2). For example, in Q4/2023, among women of reproductive age (18–44 years), 24.7% (95% CI = 24.4% to 25.1%) had fills for BP-elevating medications, compared to only 11.6% (95% CI = 11.4% to 11.8%) of men of the same age group. Similarly, prescription fills for BP-elevating medications in Q4/2023 were higher among females in comparison to males for other adult age groups — 30.5% (95% CI = 30.2% to 30.9%) vs 17.7% (95% CI = 17.4% to 18.0%) among 45–64 years, 30.7% (95% CI = 30.3% to 31.2%) vs 20.4% (95% CI = 19.8% to 21.1%) among 65–74 years, and 25.2% (95% CI = 24.4% to 26.0%) versus 18.3% (95% CI = 17.7% to 18.8%) among  $\geq 75$  years.

From Q1/2017 to Q4/2023, prescription fills for BP-elevating medications increased among males and females aged 45 years or above. Among females, the sharpest increase in prescription fills for BP-elevating medications occurred among those aged  $\geq 75$  years (19.5% increase; from 21.1% to 25.2%;  $p < 0.001$ ), followed by those aged 65–74 years (14.1% increase, from 26.9% to 30.7%,  $p < 0.001$ ), and 45–64 years (8.7% increase, from 28.1% to 30.5%,  $p < 0.001$ ). Among males, the sharpest increase in prescription fills for BP-elevating medications occurred among those aged 65–74 years (17.2% increase; from 17.4% to 20.4%;  $p < 0.001$ ), followed by those aged  $\geq 75$  years (16.9% increase; from 15.6% to 18.3%;  $p < 0.001$ ), and 45–64 years (4.1% increase; from 28.1% to 30.5%;  $p = 0.004$ ).

Among BP-elevating medications with largest increase in prescription fills from Q1/2017 to Q4/2023 for females, most common therapeutic classes were stimulants, atypical antipsychotics, antidepressants, estrogen-containing medications, and corticosteroids (Tables S4 and S6). Among males, most common therapeutic classes were stimulants, atypical antipsychotics, corticosteroids, and NSAIDs.

### ***Prescription fills for antihypertensive medications overall and by sex and age groups***

Prescription fills for antihypertensive medications were higher for older age groups and were similar by age group for both sexes. For example, in Q4/2023 prescription fills for antihypertensive medications were highest among those aged  $\geq 75$  years (females = 54.1% vs males = 51.6%) followed by those aged 65–74 years (females = 45.2% vs males = 45.9%), 45–64 years (females = 26.8% vs males = 27.3%), 18–44 years (females = 7.0% vs males = 5.3%), and 0–17 years (females = 1.0% vs males = 1.3%). However, there was some variation in trends in prescription fills for antihypertensive medication by sex and age group over time. From

Q1/2017 to Q4/2023, prescription fills for antihypertensive medications increased among all sex and age groups, except among females aged  $\geq 75$  years and among males aged 0–17 years.

Among females, the sharpest increase in prescription fills for antihypertensive medications occurred among those aged 0–17 years (34.3% increase; from 0.7% to 1.0%;  $p < 0.001$ ), followed by those aged 18–44 years (29.8% increase; from 5.4% to 7.0%;  $p < 0.001$ ), 45–64 years (6.6% increase; from 25.1% to 26.8%;  $p < 0.002$ ), and 65–74 years (6.6% increase; from 42.4% to 45.2%;  $p < 0.001$ ). Among males, the sharpest increase in prescription fills for antihypertensive medications occurred among those aged 18–44 years (18.6% increase; from 4.5% to 5.3%;  $p < 0.001$ ), followed by those aged  $\geq 75$  years (12.8% increase; from 45.8% to 51.6%;  $p < 0.001$ ), 65–74 years (12.5% increase; from 40.8% to 45.9%;  $p < 0.001$ ), and 45–64 years (6.2% increase; from 25.7% to 27.3%;  $p < 0.001$ ).

Among antihypertensive medications with the largest increases in prescription fills from Q1/2017 to Q4/2023, most common therapeutic classes among females and males were angiotensin receptor blockers, beta blockers, and calcium channel blockers (Tables S5 and S7).

## **DISCUSSION**

This is the first study to present national trends of BP-elevating and antihypertensive medications, individually and concurrently, in the US. We provided recent trends across 28 quarters of data, using comprehensive lists of BP-elevating and antihypertensive medications. There were several key findings. First, about one out of every twenty persons in the US filled concurrent prescriptions for BP-elevating and antihypertensive medications, and concurrent fills increased by 15.9% during the study period. Second, nearly one in five persons in the US filled a prescription for a BP-elevating medication, either alone or concurrently with an antihypertensive

medication, and fills for BP-elevating medications were higher among females than males for all adult age groups. Third, there was a significant rise in antihypertensive prescription fills among females under 45 years old and males aged 18–44 years.

In a recent study, Vitarello et al. reported that 14.9% of US adults and 18.5% of US adults with hypertension used medications that can elevate blood pressure during 2009–2018.<sup>9</sup> We observed that the prevalence of prescription fills for BP-elevating medications was 17.9% (12.5% individually and 5.4% concurrently) in Q1/2017, which rose to 18.9% (12.7% individually and 6.1% concurrently) in Q4/2023. Our prevalence estimates for BP-elevating medications were higher than Vitarello et al. This difference could be due to our inclusion of a wider range of BP-elevating medications or our use of more recent data. We reported 15.9% increase in concurrent prescription fills for BP-elevating and antihypertensive medications during 2017–2023; such fills could hinder BP control for persons with hypertension. Recent estimates from 2013–2014 to 2017–2018 indicate a decline in BP control from 53.8% to 43.7% among adults with hypertension and from 72.2% to 64.8% among adults taking antihypertensive medication.<sup>8</sup> The growth in concurrent BP-elevating and antihypertensive medication use might be a contributing factor in these trends. While many BP-elevating medications are beneficial or even life-saving, for individual patients with hypertension, clinicians and healthcare teams can examine concurrent prescriptions, consider risks and benefits of BP-elevating medications, and consider alternatives for BP-elevating medications when appropriate.

For all adult age groups in Q4/2023, we observed a higher percentage of prescription fills for BP-elevating medications among women (approximately 25–31%) compared to men (11–20%). The higher percentage of prescription fills for BP-elevating medications among females

aged 18 to 44 years was primarily due to the use of estrogen-containing medications, specifically combined oral contraceptives. Estimates from 2017–2019 indicate that the most common contraceptive methods among females aged 15–49 years in the US included contraceptive pills (14.0%, although the study did not distinguish between types of oral contraceptives).<sup>43</sup> For other age groups among females, the largest increases in prescription fills occurred for medication classes such as stimulants, atypical antipsychotics, antidepressants, and corticosteroids. Prior studies have shown that a higher percentage of women than men use potentially BP-elevating medications such as antidepressants,<sup>44</sup> NSAIDs,<sup>45,46</sup> stimulants,<sup>47</sup> and antipsychotics.<sup>48-50</sup> For example, a higher percentage of women (17.7%) used an antidepressant than men (8.4%) during 2015–2018.<sup>44,51</sup> Higher usage of BP-elevating medication among women than men is concerning as it might negatively affect BP control in this population. According to recent findings on BP control among adults with hypertension, BP control declined significantly among women (from 56.3% in 2009–2012 to 47.9% in 2017–2020) in comparison to no significant change among men (from 50.4% in 2009–2012 to 49.0% in 2017–2020).<sup>52</sup>

During 2017–2023, prescription fills for antihypertensive medications increased over time across most sex and age groups. Although prescription fills for antihypertensive medications were higher among older age groups, consistent with their higher prevalence of hypertension,<sup>4</sup> the most meaningful *increase* in prescription fills for antihypertensive medications was observed among younger age groups. Our estimates suggest an increasing trend of prescription fills for antihypertensive medications among females (29.8% increase) and males (18.6% increase) of reproductive age (18–44 years) from Q1/2017 to Q4/2023. Although, to our knowledge, there are no recent estimates of antihypertensive usage by age- and sex-specific

groups for the US population overall, our results are consistent with recent estimates of antihypertensive usage among adults with hypertension. For example, Sekkarie et al.<sup>16</sup> reported that antihypertensive usage among adults with hypertension increased for women (from 64.4% to 68.5%) and men (from 56.8% to 59.4%) during 2017–2021. Similar to our findings, Sekkarie et al. documented the highest increase in antihypertensives usage among persons aged 18–44 years (from 38.0% to 42.5%) during 2017–2021.<sup>16</sup> Given the increasing percentage of reproductive age women taking antihypertensive medications, these women and their medical providers may need to be aware of the clinical guidance for the safe use of contraception among women with personal characteristics and medical conditions such as hypertension when providing contraceptive counseling.<sup>53</sup>

The findings of this study have important implications for public health and clinical practice. Establishing clinical guidance for managing concurrent BP-elevating and antihypertensive medication use could help mitigate adverse effects on BP control. For patients with hypertension, mitigation strategies could include alternative treatments when appropriate, or potential intensification of antihypertensive therapy when BP-elevating medication is needed and conflicting effects on BP are unavoidable. Clinical decision support tools that screen for medications with divergent effects on BP could help facilitate tailored medication regimens to support BP management. Lastly, pharmacotherapy research is needed to understand if certain antihypertensive medications are more effective at lowering BP when various classes of BP-elevating medications are being taken.

## **Limitations**

This study has limitations. First, although the TPT database covers 94% of outpatient retail prescriptions and provides nationally projected estimates, it excludes mail-order prescription fills and does not include cash purchases or over-the-counter medications. Second, concurrent fill data were not available by sex and age group from the TPT database. Thus, we were unable to examine concurrent prescription fills for BP-elevating and antihypertensive medications by sex and age groups. Third, dosage, duration, and frequency of administration information was unavailable, and we were unable to determine whether or how these medications were taken. For example, the concurrent prescription fills only included cases when the prescription fills for both BP-elevating and antihypertensive medications occurred in the same quarter; however, it could be possible that the medications were not taken at the same time. Additionally, some BP-elevating medications are typically taken on an as-needed basis while others are taken daily. We could not, for example, exclude BP-elevating medications taken at such low doses or for such short durations that they might not have meaningfully impacted BP. Fourth, we did not have data on other critical factors that could have potentially influenced prescription patterns, such as income, race, and region. Fifth, we were unable to identify the underlying conditions or diagnoses for which these medications were prescribed, so, for example, we could not restrict analyses to persons with hypertension. Sixth, while BP-elevating effects of some therapeutic classes are well-established, there is limited evidence documenting the prevalence, magnitude, and biological mechanism of BP elevation for some therapeutic classes of the included BP-elevating medications. Future studies can address the limitations of this study to provide a more nuanced understanding of concurrent and individual prescription fills for BP-elevating and antihypertensive medications.

## CONCLUSIONS

Hypertension is a modifiable cardiovascular disease risk factor affecting nearly half of US adults, and over half of adults with hypertension have uncontrolled BP. This study reported a rising national trend in concurrent prescription fills for BP-elevating and antihypertensive medications, and a higher use of BP-elevating medications among adult women compared to men. Concurrent use of BP-elevating and antihypertensive medications might hinder efforts to control BP among persons with hypertension. Evidence from this study could inform clinicians and patients as they consider medication options and hypertension management strategies.



## References

1. Wall HK, Ritchey MD, Gillespie C, Omura JD, Jamal A, George MG. Vital Signs: prevalence of key cardiovascular disease risk factors for Million Hearts 2022 — United States, 2011–2016. *MMWR Morbidity and mortality weekly report*. 2018;67(35):983-991. doi:10.15585/mmwr.mm6735a4
2. Sidney S, Quesenberry CP, Jaffe MG, et al. Recent trends in cardiovascular mortality in the United States and public health goals. *JAMA Cardiol*. 2016;1(5):594-599. doi:10.1001/jamacardio.2016.1326
3. Johnson CO, Decleene NK, Blacker BF, et al. State-level cardiovascular mortality rates among Hispanic, Non-Hispanic Black, and Non-Hispanic White populations, 1990 to 2019. *JAMA Cardiol*. 2023;8(5):429-442. doi:10.1001/jamacardio.2023.0112
4. Centers for Disease Control and Prevention (CDC). Hypertension cascade: hypertension prevalence, treatment and control estimates among US adults aged 18 years and older applying the criteria from the American College of Cardiology and American Heart Association's 2017 Hypertension Guideline—NHANES 2017–2020. Accessed March 22, 2024., <https://millionhearts.hhs.gov/data-reports/hypertension-prevalence.html>
5. Vaduganathan M, Claggett BL, Juraschek SP, Solomon SD. Assessment of long-term benefit of intensive blood pressure control on residual life span: secondary analysis of the Systolic Blood Pressure Intervention Trial (SPRINT). *JAMA Cardiol*. 2020;5(5):576-581. doi:10.1001/jamacardio.2019.6192
6. Ritchey MD, Wall HK, George MG, Wright JS. US trends in premature heart disease mortality over the past 50 years: Where do we go from here? *Trends Cardiovasc Med*. Aug 2020;30(6):364-374. doi:10.1016/j.tcm.2019.09.005
7. Xie X, Atkins E, Lv J, et al. Effects of intensive blood pressure lowering on cardiovascular and renal outcomes: updated systematic review and meta-analysis. *Lancet*. Jan 30 2016;387(10017):435-43. doi:10.1016/s0140-6736(15)00805-3
8. Muntner P, Hardy ST, Fine LJ, et al. Trends in blood pressure control among US adults with hypertension, 1999-2000 to 2017-2018. *JAMA*. 2020;324(12):1190. doi:10.1001/jama.2020.14545
9. Vitarello JA, Fitzgerald CJ, Cluett JL, Juraschek SP, Anderson TS. Prevalence of medications that may raise blood pressure among adults with hypertension in the United States. *JAMA Internal Medicine*. 2022-01-01 2022;182(1):90. doi:10.1001/jamainternmed.2021.6819
10. Whelton PK, Carey RM, Aronow WS, et al. 2017 ACC/AHA/AAPA/ABC/ACPM/AGS/APhA/ASH/ASPC/NMA/PCNA Guideline for the Prevention, Detection, Evaluation, and Management of High Blood Pressure in Adults: A Report of the American College of Cardiology/American Heart Association Task Force on Clinical Practice Guidelines. *Journal of the American College of Cardiology*. 2018/05/15/ 2018;71(19):e127-e248. doi:<https://doi.org/10.1016/j.jacc.2017.11.006>
11. Riar SK, Blowey DL. Medication and substance-induced hypertension: Mechanisms and management. In: Flynn JT, Ingelfinger JR, Brady TM, eds. *Pediatric Hypertension*. Springer International Publishing; 2023:683-700.
12. Rossi GP, Seccia TM, Maniero C, Pessina AC. Drug-related hypertension and resistance to antihypertensive treatment: a call for action. *J Hypertens*. Dec 2011;29(12):2295-309. doi:10.1097/HJH.0b013e32834c465d

13. Lin PD, Rifas-Shiman S, Merriman J, et al. Trends of antihypertensive prescription among US adults from 2010 to 2019 and changes following treatment guidelines: Analysis of multicenter electronic health records. *J Am Heart Assoc.* 2024:e032197. doi:10.1161/jaha.123.032197
14. Derington CG, Bress AP, Herrick JS, et al. Antihypertensive medication regimens used by US adults with hypertension and the potential for fixed-dose combination products: The National Health and Nutrition Examination Surveys 2015 to 2020. *Journal of the American Heart Association.* 2023;12(11)doi:10.1161/jaha.122.028573
15. Yang PK, Park SY, Jackson SL, et al. Trends and characteristics of blood pressure prescription fills before and during the COVID-19 pandemic in the United States. *Am J Hypertens.* 2023;doi:10.1093/ajh/hpad036
16. Sekkarie A, Fang J, Hayes D, Loustalot F. Prevalence of self-reported hypertension and antihypertensive medication use among adults - United States, 2017-2021. *MMWR Morbidity and mortality weekly report.* Mar 7 2024;73(9):191-198. doi:10.15585/mmwr.mm7309a1
17. Sekkarie A, Park S, Therrien NL, et al. Trends in lipid-lowering prescriptions: increasing use of guideline-concordant pharmacotherapies, U.S., 2017-2022. *American journal of preventive medicine.* 2023;64(4):561-566. doi:10.1016/j.amepre.2022.10.010
18. Hwang AY, Dave CV, Smith SM. Use of Prescription Medications That Potentially Interfere With Blood Pressure Control in New-Onset Hypertension and Treatment-Resistant Hypertension. *Am J Hypertens.* Nov 13 2018;31(12):1324-1331. doi:10.1093/ajh/hpy118
19. Grossman E, Messerli FH. Drug-induced hypertension: an unappreciated cause of secondary hypertension. *Am J Med.* 2012;125(1):14-22. doi:10.1016/j.amjmed.2011.05.024
20. Grossman E, Messerli FH. Secondary hypertension: interfering substances. *J Clin Hypertens (Greenwich).* 2008;10(7):556-66. doi:10.1111/j.1751-7176.2008.07758.x
21. Beck KR, Thompson GR, 3rd, Odermatt A. Drug-induced endocrine blood pressure elevation. *Pharmacol Res.* 2020;154:104311. doi:10.1016/j.phrs.2019.104311
22. Blankfield RP, Iftikhar IH. Food and drug administration regulation of drugs that raise blood pressure. *Journal of cardiovascular pharmacology and therapeutics.* 2015;20(1):5-8. doi:10.1177/1074248414531852
23. Flack J. Prescription and over the counter medications that impact blood pressure. presented at: American Heart Association Hypertension Scientific Sessions; 2022; San Diego, CA.
24. MacIntyre IM, Turtle EJ, Farrah TE, et al. Regular Acetaminophen Use and Blood Pressure in People With Hypertension: The PATH-BP Trial. *Circulation.* Feb 8 2022;145(6):416-423. doi:10.1161/CIRCULATIONAHA.121.056015
25. Spence JD, Grosser T, FitzGerald GA. Acetaminophen, Nonsteroidal Anti-Inflammatory Drugs, and Hypertension. *Hypertension.* Sep 2022;79(9):1922-1926. doi:10.1161/HYPERTENSIONAHA.122.19315
26. Forman JP, Stampfer MJ, Curhan GC. Non-narcotic analgesic dose and risk of incident hypertension in US women. *Hypertension.* Sep 2005;46(3):500-7. doi:10.1161/01.HYP.0000177437.07240.70
27. Calvi A, Fischetti I, Verzicco I, et al. Antidepressant Drugs Effects on Blood Pressure. *Front Cardiovasc Med.* 2021;8:704281. doi:10.3389/fcvm.2021.704281
28. Pillinger T, McCutcheon RA, Vano L, et al. Comparative effects of 18 antipsychotics on metabolic function in patients with schizophrenia, predictors of metabolic dysregulation, and

- association with psychopathology: a systematic review and network meta-analysis. *Lancet Psychiatry*. Jan 2020;7(1):64-77. doi:10.1016/S2215-0366(19)30416-X
29. Rognoni C, Bertolani A, Jommi C. Second-Generation Antipsychotic Drugs for Patients with Schizophrenia: Systematic Literature Review and Meta-analysis of Metabolic and Cardiovascular Side Effects. *Clin Drug Investig*. Apr 2021;41(4):303-319. doi:10.1007/s40261-021-01000-1
30. Masenga SK, Povia JP, Choonga ME, Hamooya BM. A “Return to Health” Is Associated With Blood Pressure Increase After a Year of Antiretroviral Therapy in People With HIV. *American Journal of Hypertension*. 2022;35(11):915-917. doi:10.1093/ajh/hpac094
31. Kavishe BB, Olsen MF, Filteau S, et al. Blood Pressure and Body Composition During First Year of Antiretroviral Therapy in People With HIV Compared With HIV-Uninfected Community Controls. *American Journal of Hypertension*. 2022-11-02 2022;35(11):929-937. doi:10.1093/ajh/hpac085
32. Nduka CU, Stranges S, Sarki AM, Kimani PK, Uthman OA. Evidence of increased blood pressure and hypertension risk among people living with HIV on antiretroviral therapy: a systematic review with meta-analysis. *Journal of human hypertension*. 2016-06-01 2016;30(6):355-362. doi:10.1038/jhh.2015.97
33. Cameron NA, Blyler CA, Bello NA. Oral Contraceptive Pills and Hypertension: A Review of Current Evidence and Recommendations. *Hypertension*. May 2023;80(5):924-935. doi:10.1161/HYPERTENSIONAHA.122.20018
34. Armstrong EP, Malone DC. The impact of nonsteroidal anti-inflammatory drugs on blood pressure, with an emphasis on newer agents. *Clinical Therapeutics*. Jan 2003 2003;25(1):1-18. doi:10.1016/s0149-2918(03)90003-8
35. Chan CC, Reid CM, Aw TJ, Liew D, Haas SJ, Krum H. Do COX-2 inhibitors raise blood pressure more than nonselective NSAIDs and placebo? An updated meta-analysis. *J Hypertens*. Dec 2009;27(12):2332-41. doi:10.1097/HJH.0b013e3283310dc9
36. Rivasi G, Menale S, Turrin G, Coscarelli A, Giordano A, Ungar A. The effects of pain and analgesic medications on blood pressure. *Curr Hypertens Rep*. 2022;24(10):385-394. doi:10.1007/s11906-022-01205-5
37. Touyz RM, Herrmann SMS, Herrmann J. Vascular toxicities with VEGF inhibitor therapies-focus on hypertension and arterial thrombotic events. *J Am Soc Hypertens*. Jun 2018;12(6):409-425. doi:10.1016/j.jash.2018.03.008
38. CDC WONDER. National Center for Health Statistics. Mortality data on CDC WONDER. Accessed May 14, 2024. <https://wonder.cdc.gov/Deaths-by-Underlying-Cause.html>.
39. National Cancer Institute. Joinpoint regression program, Version 5.1.0 - April 2024; Statistical Methodology and Applications Branch, Surveillance Research Program.
40. Kim HJ, Fay MP, Feuer EJ, Midthune DN. Permutation tests for joinpoint regression with applications to cancer rates. *Statistics in medicine*. Feb 15 2000;19(3):335-51. doi:10.1002/(sici)1097-0258(20000215)19:3<335::aid-sim336>3.0.co;2-z
41. Hincapie-Castillo JM, Goodin A. Using Joinpoint regression for drug utilization research: Tutorial and case study of prescription opioid use in the United States. *Pharmacoepidemiol Drug Saf*. 2023;32(5):509-516. doi:10.1002/pds.5606
42. Mariotto AB, Feuer EJ, Howlader N, Chen HS, Negoita S, Cronin KA. Interpreting cancer incidence trends: challenges due to the COVID-19 pandemic. *J Natl Cancer Inst*. Sep 7 2023;115(9):1109-1111. doi:10.1093/jnci/djad086

43. Daniels K, Abma JC. Current contraceptive status among women aged 15-49: United States, 2017-2019. *NCHS Data Brief*. 2020;(388):1-8.
44. Brody DJ, Gu Q. Antidepressant use among adults: United States, 2015-2018. *NCHS Data Brief*. 2020;(377):1-8.
45. Gorfinkel LR, Hasin D, Saxon AJ, et al. Trends in prescriptions for non-opioid pain medications among U.S. adults with moderate or severe pain, 2014-2018. *J Pain*. 2022;23(7):1187-1195. doi:10.1016/j.jpain.2022.01.006
46. Davis JS, Lee HY, Kim J, et al. Use of non-steroidal anti-inflammatory drugs in US adults: changes over time and by demographic. *Open Heart*. 2017;4(1):e000550. doi:10.1136/openhrt-2016-000550
47. Board AR, Guy G, Jones CM, Hoots B. Trends in stimulant dispensing by age, sex, state of residence, and prescriber specialty - United States, 2014-2019. *Drug Alcohol Depend*. Dec 1 2020;217:108297. doi:10.1016/j.drugalcdep.2020.108297
48. Park Y, Huybrechts KF, Cohen JM, et al. Antipsychotic medication use among publicly insured pregnant women in the United States. *Psychiatr Serv*. Nov 1 2017;68(11):1112-1119. doi:10.1176/appi.ps.201600408
49. Olfson M, King M, Schoenbaum M. Antipsychotic treatment of adults in the United States. *J Clin Psychiatry*. Oct 2015;76(10):1346-53. doi:10.4088/JCP.15m09863
50. Dennis JA, Gittner LS, Payne JD, Nugent K. Characteristics of U.S. adults taking prescription antipsychotic medications, National Health and Nutrition Examination Survey 2013-2018. *BMC Psychiatry*. Oct 1 2020;20(1):483. doi:10.1186/s12888-020-02895-4
51. Luo Y, Kataoka Y, Ostinelli EG, Cipriani A, Furukawa TA. National prescription patterns of antidepressants in the treatment of adults with major depression in the US between 1996 and 2015: a population representative survey based analysis. *Front Psychiatry*. 2020;11:35. doi:10.3389/fpsy.2020.00035
52. Muntner P, Miles MA, Jaeger BC, et al. Blood pressure control among US adults, 2009 to 2012 through 2017 to 2020. *Hypertension*. 2022-09-01 2022;79(9):1971-1980. doi:10.1161/hypertensionaha.122.19222
53. Nguyen AT, Curtis KM, Tepper NK, et al. U.S. Medical Eligibility Criteria for Contraceptive Use, 2024. *MMWR Recomm Rep*. Aug 8 2024;73(4):1-126. doi:10.15585/mmwr.rr7304a1

## Tables and Figures

Table 1: Number of unique individuals and population percent with prescription fills for any BP-elevating medication alone, any antihypertensive medication alone, and concurrent prescription fills for any BP-elevating plus any antihypertensive medication in Q1/2017 and Q4/2023 from IQVIA's TPT Q1, 2017–Q4, 2023<sup>a</sup>

| Group                                                                                    | Q1/2017  |              |              |              | Q4/2023  |              |              |              | Percent change from Q1/2017 to Q4/2023 <sup>b</sup> |
|------------------------------------------------------------------------------------------|----------|--------------|--------------|--------------|----------|--------------|--------------|--------------|-----------------------------------------------------|
|                                                                                          | Count    | Pop. percent | 95% lower CI | 95% upper CI | Count    | Pop. percent | 95% lower CI | 95% upper CI |                                                     |
| <b>Overall</b>                                                                           |          |              |              |              |          |              |              |              |                                                     |
| BPE Alone                                                                                | 40775287 | 12.5         | 12.4         | 12.6         | 42293817 | 12.7         | 12.6         | 12.8         | 1.4                                                 |
| Anti-HTN Alone                                                                           | 32823564 | 10.1         | 10.0         | 10.2         | 36773683 | 11.0         | 10.9         | 11.1         | 9.5*                                                |
| Anti-HTN + BPE Concurrent                                                                | 17449846 | 5.4          | 5.3          | 5.4          | 20694112 | 6.2          | 6.1          | 6.3          | 15.9*                                               |
| <i>Female, Prescription fills for BP-elevating medications (alone or concurrent)</i>     |          |              |              |              |          |              |              |              |                                                     |
| 0–17                                                                                     | 3218663  | 8.9          | 8.7          | 9.2          | 3284969  | 9.3          | 9.0          | 9.6          | 4.0                                                 |
| 18–44                                                                                    | 14371855 | 24.9         | 24.6         | 25.2         | 14648654 | 24.7         | 24.4         | 25.1         | -0.5                                                |
| 45–64                                                                                    | 12144460 | 28.1         | 27.8         | 28.5         | 12694235 | 30.5         | 30.2         | 30.9         | 8.7*                                                |
| 65–74                                                                                    | 4258200  | 26.9         | 26.1         | 27.8         | 5495503  | 30.7         | 30.3         | 31.2         | 14.1*                                               |
| ≥75                                                                                      | 2634337  | 21.1         | 20.4         | 21.7         | 3524894  | 25.2         | 24.4         | 26.0         | 19.5*                                               |
| <i>Male, Prescription fills for BP-elevating medications (alone or concurrent)</i>       |          |              |              |              |          |              |              |              |                                                     |
| 0–17                                                                                     | 3978019  | 10.6         | 10.2         | 10.9         | 3833869  | 10.3         | 10.0         | 10.7         | -2.2                                                |
| 18–44                                                                                    | 6059425  | 10.3         | 10.1         | 10.4         | 7117764  | 11.6         | 11.4         | 11.8         | 13.1                                                |
| 45–64                                                                                    | 6999287  | 17.0         | 16.7         | 17.3         | 7250265  | 17.7         | 17.4         | 18.0         | 4.1*                                                |
| 65–74                                                                                    | 2417488  | 17.4         | 16.9         | 18.0         | 3248851  | 20.4         | 19.8         | 21.1         | 17.2*                                               |
| ≥75                                                                                      | 1357037  | 15.6         | 15.1         | 16.1         | 1830013  | 18.3         | 17.7         | 18.8         | 16.9*                                               |
| <i>Female, Prescription fills for antihypertensive medications (alone or concurrent)</i> |          |              |              |              |          |              |              |              |                                                     |
| 0–17                                                                                     | 262530   | 0.7          | 0.7          | 0.8          | 346233   | 1.0          | 0.9          | 1.0          | 34.3*                                               |
| 18–44                                                                                    | 3106753  | 5.4          | 5.2          | 5.5          | 4133050  | 7.0          | 6.8          | 7.2          | 29.8*                                               |
| 45–64                                                                                    | 10862267 | 25.1         | 24.8         | 25.5         | 11142799 | 26.8         | 26.5         | 27.1         | 6.6*                                                |
| 65–74                                                                                    | 6702170  | 42.4         | 41.7         | 43.1         | 8078775  | 45.2         | 44.6         | 45.8         | 6.6*                                                |
| ≥75                                                                                      | 6069932  | 48.6         | 47.9         | 49.4         | 7569161  | 54.1         | 53.4         | 54.8         | 11.3                                                |
| <i>Male, Prescription fills for antihypertensive medications (alone or concurrent)</i>   |          |              |              |              |          |              |              |              |                                                     |
| 0–17                                                                                     | 483457   | 1.3          | 1.2          | 1.3          | 479766   | 1.3          | 1.3          | 1.3          | 0.7                                                 |
| 18–44                                                                                    | 2652720  | 4.5          | 4.4          | 4.6          | 3267689  | 5.3          | 5.2          | 5.5          | 18.6*                                               |
| 45–64                                                                                    | 10594263 | 25.7         | 25.4         | 26.1         | 11196741 | 27.3         | 27.0         | 27.7         | 6.2*                                                |
| 65–74                                                                                    | 5667990  | 40.8         | 40.2         | 41.5         | 7308480  | 45.9         | 45.2         | 46.6         | 12.5*                                               |
| ≥75                                                                                      | 3978876  | 45.8         | 44.4         | 47.2         | 5173761  | 51.6         | 50.0         | 53.2         | 12.8*                                               |

Abbreviations: BPE, blood pressure-elevating; Anti-HTN, antihypertensive; CI, confidence interval; Pop, population

<sup>a</sup>This table presents the prescription fills for BP-elevating and antihypertensive medications for Q1/2017 and Q4/2023 from IQVIA's Total Patient Tracker database.

<sup>b</sup>The percent change is obtained by comparing the population percent from Q1/2017 to Q4/2023. Percent change with statistical significance of p-value <0.05 from Joinpoint regression are highlighted with asterisk (\*) sign.



Table 2: Joinpoint regression results along with absolute change in Q4/2023 in comparison to Q1/2017 for concurrent and individual prescription fills for blood pressure (BP)-elevating and antihypertensive medications overall and by sex and age groups

| Group                                                                                    | Number of join points | Slope change quarter | AQPC <sup>a</sup> | 95% lower CI | 95% upper CI | AQPC <sup>a</sup> P-value | Percent change from Q1, 2017 to Q4, 2023 |
|------------------------------------------------------------------------------------------|-----------------------|----------------------|-------------------|--------------|--------------|---------------------------|------------------------------------------|
| <b>Overall</b>                                                                           |                       |                      |                   |              |              |                           |                                          |
| BPE alone                                                                                | 0                     | NA                   | 0.02              | -0.11        | 0.2          | 0.7                       | 1.4                                      |
| Anti-HTN alone                                                                           | 1                     | Q17                  | 0.4*              | 0.3          | 0.4          | <0.001                    | 9.5*                                     |
| Anti-HTN + BPE concurrent                                                                | 0                     | NA                   | 0.6*              | 0.5          | 0.6          | <0.001                    | 15.9*                                    |
| <b>Female, Prescription fills for BP-elevating medications (alone or concurrent)</b>     |                       |                      |                   |              |              |                           |                                          |
| 0 to 17                                                                                  | 0                     | NA                   | -0.3              | -0.8         | 0.3          | 0.3                       | 4.0                                      |
| 18 to 44                                                                                 | 2                     | Q17, Q20             | -0.1              | -0.6         | 0.3          | 0.8                       | -0.5                                     |
| 45 to 64                                                                                 | 0                     | NA                   | 0.4*              | 0.3          | 0.4          | <0.001                    | 8.7*                                     |
| 65 to 74                                                                                 | 0                     | NA                   | 0.5*              | 0.5          | 0.6          | <0.001                    | 14.1*                                    |
| ≥75                                                                                      | 0                     | NA                   | 0.7*              | 0.6          | 0.8          | <0.001                    | 19.5*                                    |
| <b>Male, Prescription fills for BP-elevating medications (alone or concurrent)</b>       |                       |                      |                   |              |              |                           |                                          |
| 0 to 17                                                                                  | 0                     | NA                   | -0.4              | -0.9         | 0.1          | 0.1                       | -2.2                                     |
| 18 to 44                                                                                 | 2                     | Q17, Q20             | 0.5               | -0.1         | 1.0          | 0.1                       | 13.1                                     |
| 45 to 64                                                                                 | 0                     | NA                   | 0.1*              | 0.1          | 0.2          | 0.004                     | 4.1*                                     |
| 65 to 74                                                                                 | 0                     | NA                   | 0.6*              | 0.5          | 0.7          | <0.001                    | 17.2*                                    |
| ≥75                                                                                      | 0                     | NA                   | 0.7*              | 0.5          | 0.8          | <0.001                    | 16.9*                                    |
| <b>Female, Prescription fills for antihypertensive medications (alone or concurrent)</b> |                       |                      |                   |              |              |                           |                                          |
| 0 to 17                                                                                  | 0                     | NA                   | 1.1*              | 0.9          | 1.2          | <0.001                    | 34.3*                                    |
| 18 to 44                                                                                 | 2                     | Q9, Q20              | 0.9*              | 0.8          | 1.0          | <0.001                    | 29.8*                                    |
| 45 to 64                                                                                 | 1                     | Q21                  | 0.2*              | 0.1          | 0.3          | <0.002                    | 6.6*                                     |
| 65 to 74                                                                                 | 0                     | NA                   | 0.2*              | 0.2          | 0.2          | <0.001                    | 6.6*                                     |
| ≥75                                                                                      | 4                     | Q11, Q18, Q23, Q26   | 0.3               | -0.4         | 1.0          | 0.4                       | 11.3                                     |
| <b>Male, Prescription fills for antihypertensive medications (alone or concurrent)</b>   |                       |                      |                   |              |              |                           |                                          |
| 0 to 17                                                                                  | 0                     | NA                   | 0.0               | -0.1         | 0.1          | 1.0                       | 0.7                                      |
| 18 to 44                                                                                 | 0                     | NA                   | 0.6*              | 0.5          | 0.6          | <0.001                    | 18.6*                                    |
| 45 to 64                                                                                 | 1                     | Q12                  | 0.2*              | 0.1          | 0.3          | <0.001                    | 6.2*                                     |
| 65 to 74                                                                                 | 0                     | NA                   | 0.4*              | 0.4          | 0.5          | <0.001                    | 12.5*                                    |
| ≥75                                                                                      | 0                     | NA                   | 0.6*              | 0.4          | 0.7          | <0.001                    | 12.8*                                    |

Abbreviations: Anti-HTN, antihypertensive; AQPC, average quarterly percent change; BPE, blood pressure-elevating, NA, not applicable

<sup>a</sup> AQPC values are obtained from Joinpoint regression after excluding the data for year 2020. P-values <0.05 were considered statistically significant and are highlighted by asterisk (\*) sign.

Figure 1: Population percent with unique number of individuals with prescription fills for any BP-elevating medication alone, any antihypertensive medication alone, and concurrent prescription fills for any BP-elevating plus any antihypertensive medication from IQVIA’s TPT Q1, 2017–Q4, 2023<sup>a</sup>

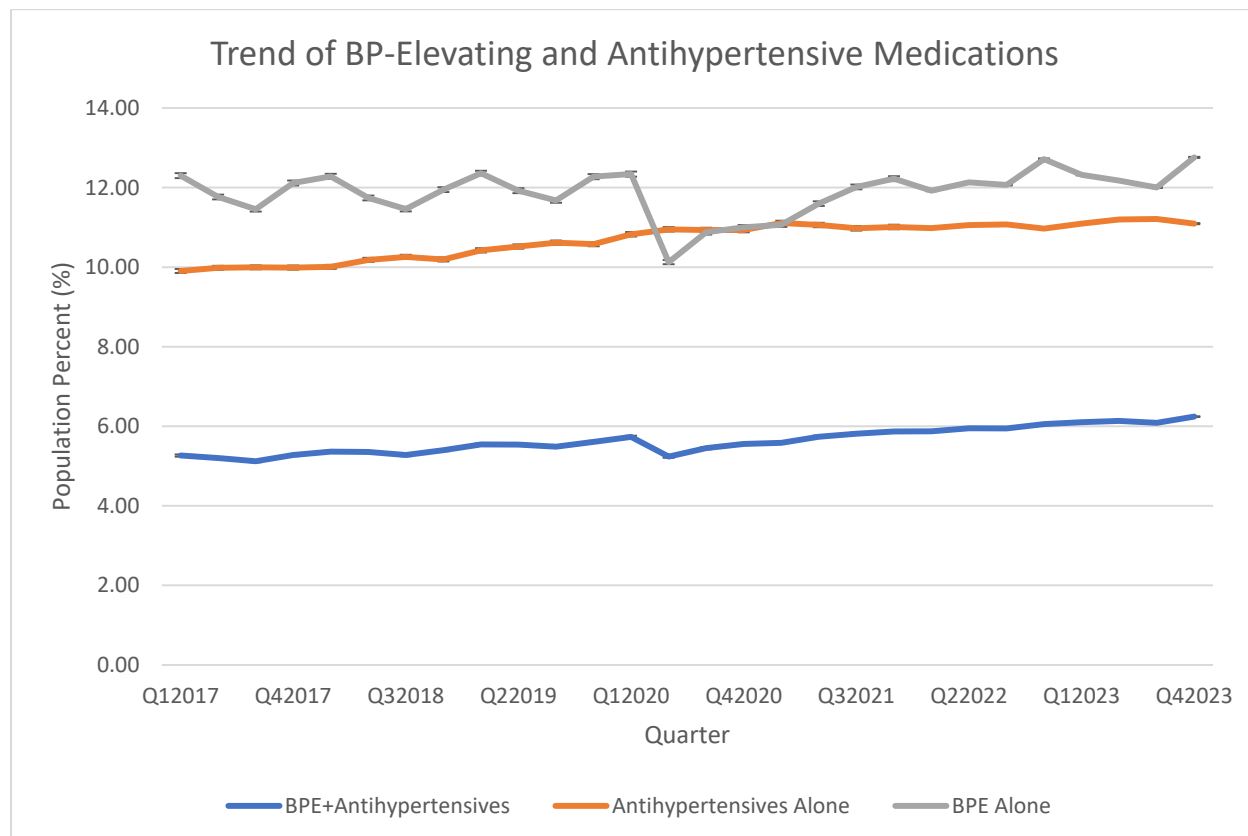

<sup>a</sup>This figure shows the quarterly trend of US population percentage for unique number of individuals with prescription fills for BP-elevating medications only, antihypertensive medications only, and concurrent prescription fills for any antihypertensive and any BP-elevating medications using IQVIA’s Total Patient Tracker database, Q1/2017 to Q4/2023. Total US population was used to obtain population percentage for all quarters. Drug prescriptions for unspecified gender and age groups were excluded. The total aggregate numbers are slightly lower than the sum of numbers from subgroups as the deduplication process removes multiple entries for the same person appearing in different age bands while removing all conflicting/missing reports of sex and age groups.

Figure 2: Projected percentage of population with prescription fills for BP-elevating and antihypertensive medication from outpatient retail pharmacies, stratified by sex and age group from IQVIA’s TPT Q1, 2017—Q4, 2023<sup>a</sup>

Panel (A): BP-elevating prescription fills

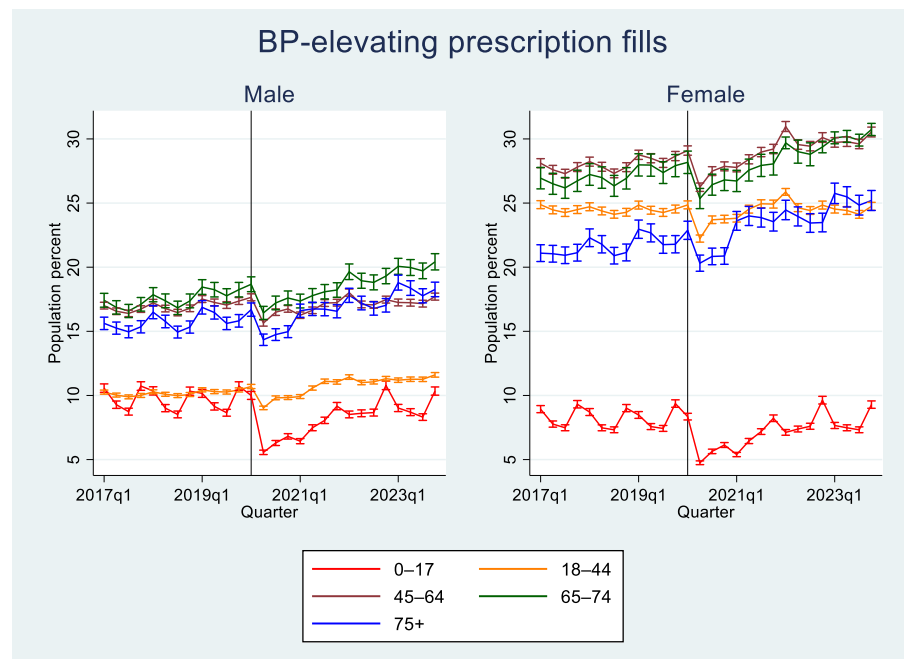

Panel (B): Antihypertensive prescription fills

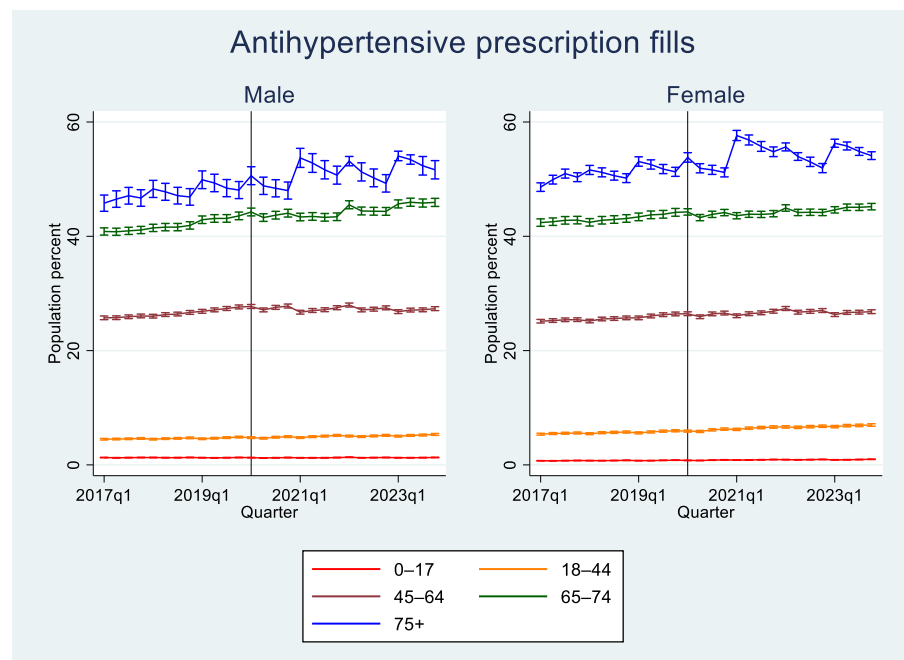

<sup>a</sup>This figure presents population percentage of individuals with prescription fills for BP-elevating (panel A) and antihypertensive medication (panel B) from Q1/2017 to Q4/2023. Annual US population totals from the CDC



WONDER dataset provided by National Center for Health Statistics (NCHS) for each group were used to report the age-specific prevalence of prescription fills in percentages. Since population denominator for year 2023 was not available, hence, population total of year 2022 was used as population denominator for both years 2022 and 2023. IQVIA's TPT portal was used to obtain deduplicated counts of individuals with prescription fill with 95% confidence interval.

### **Online Only Supplement: Tables and Figures**

Table S1: Therapeutic classes and corresponding number of products containing antihypertensive medications included in reporting the prescription fills overall and for sex and age groups from IQVIA's Total Patient Tracker (TPT) database Q1, 2017—Q4, 2023

Table S2: Therapeutic classes and corresponding number of products containing blood pressure-elevating medications included in reporting the prescription fills overall and for sex and age groups from IQVIA's Total Patient Tracker (TPT) database Q1, 2017—Q4, 2023

Table S3: Joinpoint regression estimates for full sample and for the sample excluding year 2020.

Table S4: Medication and therapeutic class of the BP-elevating medications that experienced largest increase in prescription fills by sex and age group from Q1/2017 to Q4/2023, IQVIA Total Patient Tracker

Table S5: Medication and therapeutic class of the antihypertensive medications that experienced largest increase in prescription fills by sex and age group from Q1/2017 to Q4/2023, IQVIA Total Patient Tracker

Table S6: Medication and therapeutic class of the BP-elevating medications with highest number of prescription fills by sex and age group in Q4/2023, IQVIA Total Patient Tracker

Table S7: Medication and therapeutic class of the antihypertensive medications with highest number of prescription fills by sex and age group in Q4/2023, IQVIA Total Patient Tracker

Table S1: Therapeutic classes and corresponding number of products containing antihypertensive medications included in reporting the prescription fills overall and for sex and age groups from IQVIA's Total Patient Tracker (TPT) database Q1, 2017—Q4, 2023<sup>a</sup>

| <b>Therapeutic Class</b>      | <b>Number of Products</b> |
|-------------------------------|---------------------------|
| ACE inhibitors                | 20                        |
| Aldosterone antagonist        | 3                         |
| Alpha-1 blockers              | 8                         |
| Angiotensin receptor blockers | 15                        |
| Beta blockers                 | 33                        |
| Calcium channel blockers      | 49                        |
| Centrally acting              | 8                         |
| Direct renin inhibitor        | 2                         |
| Direct vasodilators           | 2                         |
| Loop diuretic                 | 10                        |
| Potassium sparing diuretic    | 6                         |
| Thiazide diuretic             | 12                        |
| Other                         | 7                         |
| Fixed dose combination        | 65                        |
| <b><i>Total</i></b>           | <b><i>240</i></b>         |

Abbreviations: ACE, angiotensin-converting enzyme;

<sup>a</sup>This table shows the number of products included in each therapeutic class for generating the individual and concurrent reports of prescription fills for antihypertensive medications.

Table S2: Therapeutic classes and corresponding number of products containing blood pressure-elevating medications included in reporting the prescription fills overall and for sex and age groups from IQVIA’s Total Patient Tracker (TPT) database Q1, 2017—Q4, 2023<sup>a,b</sup>

| <b>Therapeutic Class</b>     | <b>Number of Products</b> |
|------------------------------|---------------------------|
| Androgens                    | 30                        |
| Antidepressants <sup>c</sup> | 59                        |
| Antineoplastic Agent         | 43                        |
| Antiretrovirals              | 72                        |
| Atypical Antipsychotics      | 51                        |
| Corticosteroids              | 66                        |
| Decongestants                | 529                       |
| Estrogen-containing          | 254                       |
| Immunomodulators             | 25                        |
| NSAIDs                       | 196                       |
| Stimulants                   | 62                        |
| <b><i>Total</i></b>          | <b><i>1,387</i></b>       |

<sup>a</sup>This table shows the number of products included in each therapeutic class for generating the individual and concurrent reports of prescription fills for BP-elevating medications.

<sup>b</sup>Careful efforts were taken to remove topical products with limited systemic absorption. However, for BPE medication, the results were generated at the molecule level instead of the therapeutic class, and might include topical products with limited systemic absorption such as topical isotretinoin.

<sup>c</sup>The following antidepressant sub-classes were included in this analysis Aminoketone, Monoamine Oxidase Inhibitors (MAOI), Serotonin-norepinephrine reuptake inhibitors (SNRI), Tricyclic antidepressants (TCA).

Table S3: Joinpoint regression estimates for full sample and for the sample excluding year 2020

|                                                                                                 | Full sample        |                                         |                      | Excluding 2020     |                                         |
|-------------------------------------------------------------------------------------------------|--------------------|-----------------------------------------|----------------------|--------------------|-----------------------------------------|
| Number of Joinpoints                                                                            | Mean square errors | Average quarterly percent change (AQPC) | Number of Joinpoints | Mean square errors | Average quarterly percent change (AQPC) |
| <b><i>Overall</i></b>                                                                           |                    |                                         |                      |                    |                                         |
| 2                                                                                               | 69.2938            | 0.1803                                  | 0                    | 41.1271            | 0.0254                                  |
| 2                                                                                               | 1.626              | 0.3286*                                 | 1                    | 1.9441             | 0.3592*                                 |
| 2                                                                                               | 13.8006            | 0.6306*                                 | 0                    | 5.9135             | 0.5609*                                 |
| <b><i>Prescription fills for BP-elevating medications, Female (alone or concurrent)</i></b>     |                    |                                         |                      |                    |                                         |
| 2                                                                                               | 72.4177            | 0.3156                                  | 0                    | 75.8871            | -0.2689                                 |
| 2                                                                                               | 14.2413            | -0.0876                                 | 2                    | 5.0196             | -0.0574                                 |
| 3                                                                                               | 11.1429            | 0.306                                   | 0                    | 10.5366            | 0.3450*                                 |
| 3                                                                                               | 2.2435             | 0.5354                                  | 0                    | 3.0496             | 0.5409*                                 |
| 3                                                                                               | 5.1013             | 0.6711                                  | 0                    | 2.8621             | 0.7054*                                 |
| <b><i>Prescription fills for BP-elevating medications, Male (alone or concurrent)</i></b>       |                    |                                         |                      |                    |                                         |
| 2                                                                                               | 68.5309            | 0.21                                    | 0                    | 67.9991            | -0.4138                                 |
| 3                                                                                               | 14.0041            | 0.498                                   | 2                    | 5.9916             | 0.4456                                  |
| 0                                                                                               | 17.7451            | 0.1358*                                 | 0                    | 9.0166             | 0.1424*                                 |
| 2                                                                                               | 3.3122             | 0.7382                                  | 0                    | 3.9473             | 0.5948*                                 |
| 1                                                                                               | 9.369              | 0.6485*                                 | 0                    | 4.5397             | 0.6455*                                 |
| <b><i>Prescription fills for antihypertensive medications, Female (alone or concurrent)</i></b> |                    |                                         |                      |                    |                                         |
| 0                                                                                               | 3.4538             | 1.09*                                   | 0                    | 2.841              | 1.0792*                                 |
| 2                                                                                               | 0.6147             | 0.9212*                                 | 2                    | 0.5374             | 0.9089*                                 |
| 1                                                                                               | 2.456              | 0.2134*                                 | 1                    | 2.0337             | 0.2150*                                 |
| 0                                                                                               | 1.7539             | 0.2049*                                 | 0                    | 1.3062             | 0.2079*                                 |
| 3                                                                                               | 13.6629            | 0.3782                                  | 4                    | 8.3083             | 0.3009                                  |
| <b><i>Prescription fills for antihypertensive medications, Male (alone or concurrent)</i></b>   |                    |                                         |                      |                    |                                         |
| 0                                                                                               | 1.6419             | -0.0102                                 | 0                    | 1.5285             | 0.0001                                  |
| 0                                                                                               | 1.0644             | 0.5783*                                 | 0                    | 1.0482             | 0.5777*                                 |
| 1                                                                                               | 3.3808             | 0.2280*                                 | 1                    | 2.7488             | 0.2250*                                 |
| 2                                                                                               | 1.7452             | 0.4920*                                 | 0                    | 2.5964             | 0.4292*                                 |
| 0                                                                                               | 4.8234             | 0.5519*                                 | 0                    | 4.4538             | 0.5475*                                 |

Table S4: Medication and therapeutic class of the BP-elevating medications that experienced largest increase in prescription fills by sex and age group from Q1/2017 to Q4/2023, IQVIA Total Patient Tracker

| Medication                                | Therapeutic class      | Change from Q1/2017 to Q4/2023 | Medication                              | Therapeutic Class      | Change from Q1/2017 to Q4/2023 |
|-------------------------------------------|------------------------|--------------------------------|-----------------------------------------|------------------------|--------------------------------|
| <i>Females, 0 to 17 years<sup>a</sup></i> |                        |                                | <i>Males, 0 to 17 years<sup>a</sup></i> |                        |                                |
| LISDEXAMFETAMIN DI                        | Stimulant              | 91105                          | LISDEXAMFETAMIN DI                      | Stimulant              | 169244                         |
| PREDNISOLONE S PH                         | Corticosteroid         | 79312                          | DEXMETHYLPHEN ER                        | Stimulant              | 88041                          |
| DEXMETHYLPHEN ER                          | Stimulant              | 50171                          | CONCERTA                                | Stimulant              | 81926                          |
| ARIPIRAZOLE                               | Atypical Antipsychotic | 46479                          | PREDNISOLONE S PH                       | Corticosteroid         | 78877                          |
| CONCERTA                                  | Stimulant              | 40390                          | DEXAMETHASONE                           | Corticosteroid         | 49682                          |
| DEXAMETHASONE                             | Corticosteroid         | 37130                          | IBUPROFEN (OTC) CHILD                   | NSAID                  | 39823                          |
| IBUPROFEN (OTC) CHILD                     | NSAID                  | 36465                          | ARIPIRAZOLE                             | Atypical Antipsychotic | 37319                          |
| DROSPIR-ETHYL ESTR                        | Estrogen-containing    | 29363                          | AZSTARYS                                | Stimulant              | 34731                          |
| ESTARYLLA                                 | Estrogen-containing    | 26290                          | JORNAY PM                               | Stimulant              | 32462                          |
| BUPROPION HCL XL                          | Antidepressant         | 25009                          | QUILLICHEW ER                           | Stimulant              | 20013                          |
| MILI                                      | Estrogen-containing    | 19286                          | DIMAPHEN DM                             | Decongestant           | 17694                          |
| ZAFEMY                                    | Estrogen-containing    | 18091                          | IBUPROFEN (RX)                          | NSAID                  | 15656                          |
| TRI-LO-MILI                               | Estrogen-containing    | 17474                          | DEXMETHYLPHEN HCL                       | Stimulant              | 13453                          |
| DULOXETINE HCL                            | Antidepressant         | 17057                          | ENDACOF-DM (OTC)                        | Decongestant           | 11850                          |
| AZSTARYS                                  | Stimulant              | 17022                          | POLYTUSSIN DM                           | Decongestant           | 11573                          |
| VIENVA                                    | Estrogen-containing    | 16740                          | METHYLPREDNISOLONE                      | Corticosteroid         | 10834                          |
| DIMAPHEN DM                               | Decongestant           | 15961                          | PREDNISONONE                            | Corticosteroid         | 10220                          |
| JORNAY PM                                 | Stimulant              | 15308                          | COTEMPLA XR-ODT                         | Stimulant              | 9161                           |
| PREDNISONONE                              | Corticosteroid         | 14546                          | LURASIDONE HCL                          | Atypical Antipsychotic | 8260                           |
| LURASIDONE HCL                            | Atypical Antipsychotic | 13863                          | BUPROPION HCL XL                        | Antidepressant         | 8059                           |
| <i>Females, 18 to 44 years</i>            |                        |                                | <i>Males, 18 to 44 years</i>            |                        |                                |
| BUPROPION HCL XL                          | Antidepressant         | 677796                         | BUPROPION HCL XL                        | Antidepressant         | 311514                         |
| LISDEXAMFETAMIN DI                        | Stimulant              | 396720                         | LISDEXAMFETAMIN DI                      | Stimulant              | 271341                         |
| PREDNISONONE                              | Corticosteroid         | 305207                         | AMPHETAMIN SALT ER                      | Stimulant              | 183719                         |

|                                |                        |        |                              |                        |        |
|--------------------------------|------------------------|--------|------------------------------|------------------------|--------|
| AMPHETAMIN SALT ER             | Stimulant              | 293868 | AMPHETAMINE SALTS            | Stimulant              | 163767 |
| AMPHETAMINE SALTS              | Stimulant              | 287769 | EMTRICITABINE/TENO           | Antiretroviral         | 129456 |
| METHYLPREDNISOLONE             | Corticosteroid         | 253525 | PREDNISONE                   | Corticosteroid         | 127659 |
| ARIPIRAZOLE                    | Atypical Antipsychotic | 208969 | ARIPIRAZOLE                  | Atypical Antipsychotic | 119863 |
| DESVENLAFAXIN SUC ER           | Antidepressant         | 177977 | TESTOSTERONE CYP             | Androgen               | 116624 |
| VIENVA                         | Estrogen-containing    | 170910 | METHYLPREDNISOLONE           | Corticosteroid         | 114538 |
| IBUPROFEN (RX)                 | NSAID                  | 150556 | DESCOVY                      | Antiretroviral         | 87408  |
| DROSPIR-ETHYL ESTR             | Estrogen-containing    | 148577 | BIKTARVY                     | Antiretroviral         | 79888  |
| ESTARYLLA                      | Estrogen-containing    | 147324 | DESVENLAFAXIN SUC ER         | Antidepressant         | 62112  |
| MILI                           | Estrogen-containing    | 146379 | BUPROPION HCL SR             | Antidepressant         | 59921  |
| BUPROPION HCL SR               | Antidepressant         | 130022 | DULOXETINE HCL               | Antidepressant         | 57624  |
| DULOXETINE HCL                 | Antidepressant         | 124382 | IBUPROFEN (RX)               | NSAID                  | 56161  |
| ETONOGEST/ETH EST              | Estrogen-containing    | 123930 | QUETIAPINE FUM               | Atypical Antipsychotic | 48602  |
| TRI-LO-MILI                    | Estrogen-containing    | 114015 | ESTRADIOL                    | Estrogen-containing    | 47789  |
| VRAYLAR                        | Atypical Antipsychotic | 113098 | VRAYLAR                      | Atypical Antipsychotic | 46383  |
| LURASIDONE HCL                 | Atypical Antipsychotic | 105231 | CELECOXIB                    | NSAID                  | 44615  |
| ELURYNG                        | Estrogen-containing    | 94255  | LURASIDONE HCL               | Atypical Antipsychotic | 41742  |
| <i>Females, 45 to 64 years</i> |                        |        | <i>Males, 45 to 64 years</i> |                        |        |
| ESTRADIOL                      | Estrogen-containing    | 469946 | TESTOSTERONE CYP             | Androgen               | 217049 |
| BUPROPION HCL XL               | Antidepressant         | 432142 | BUPROPION HCL XL             | Antidepressant         | 165262 |
| CELECOXIB                      | NSAID                  | 225919 | CELECOXIB                    | NSAID                  | 131510 |
| DULOXETINE HCL                 | Antidepressant         | 211554 | DULOXETINE HCL               | Antidepressant         | 91467  |
| METHYLPREDNISOLONE             | Corticosteroid         | 204778 | TESTOSTERONE                 | Androgen               | 88430  |
| ESTRADIOL TRANSDML             | Estrogen-containing    | 180874 | METHYLPREDNISOLONE           | Corticosteroid         | 87906  |
| IBUPROFEN (RX)                 | NSAID                  | 155574 | ASPIRIN (OTC)                | NSAID                  | 86859  |
| LISDEXAMFETAMIN DI             | Stimulant              | 145865 | AMPHETAMINE SALTS            | Stimulant              | 86319  |
| BUPROPION HCL SR               | Antidepressant         | 139503 | IBUPROFEN (RX)               | NSAID                  | 78833  |
| AMPHETAMINE SALTS              | Stimulant              | 135095 | BIKTARVY                     | Antiretroviral         | 73730  |
| DESVENLAFAXIN SUC ER           | Antidepressant         | 129290 | MELOXICAM                    | NSAID                  | 68857  |
| ARIPIRAZOLE                    | Atypical Antipsychotic | 96475  | LISDEXAMFETAMIN DI           | Stimulant              | 66996  |
| HYDROXYCHLOROQUINE<br>SULF     | Immunomodulator        | 92532  | ANASTROZOLE                  | Antineoplastic Agent   | 60956  |

|                                |                        |        |                              |                        |        |
|--------------------------------|------------------------|--------|------------------------------|------------------------|--------|
| PREDNISON                      | Corticosteroid         | 88202  | BUPROPION HCL SR             | Antidepressant         | 59133  |
| PHENTERMINE HCL                | Stimulant              | 87717  | ARIPIRAZOLE                  | Atypical Antipsychotic | 51426  |
| AMPHETAMIN SALT ER             | Stimulant              | 84033  | AMPHETAMIN SALT ER           | Stimulant              | 49378  |
| DOTTI                          | Estrogen-containing    | 76392  | DESVENLAFAXIN SUC ER         | Antidepressant         | 40232  |
| VRAYLAR                        | Atypical Antipsychotic | 74755  | EMTRICITABINE/TENO           | Antiretroviral         | 38539  |
| MELOXICAM                      | NSAID                  | 69477  | QUETIAPINE FUM               | Atypical Antipsychotic | 30925  |
| LURASIDONE HCL                 | Atypical Antipsychotic | 65434  | DEXAMETHASONE                | Corticosteroid         | 30065  |
| <i>Females, 65 to 74 years</i> |                        |        | <i>Males, 65 to 74 years</i> |                        |        |
| ESTRADIOL                      | Estrogen-containing    | 294785 | MELOXICAM                    | NSAID                  | 133860 |
| DULOXETINE HCL                 | Antidepressant         | 224517 | PREDNISON                    | Corticosteroid         | 119178 |
| BUPROPION HCL XL               | Antidepressant         | 194017 | DULOXETINE HCL               | Antidepressant         | 101890 |
| PREDNISON                      | Corticosteroid         | 163502 | CELECOXIB                    | NSAID                  | 100510 |
| METHYLPREDNISOLONE             | Corticosteroid         | 161093 | ASPIRIN (OTC)                | NSAID                  | 100032 |
| MELOXICAM                      | NSAID                  | 156758 | METHYLPREDNISOLONE           | Corticosteroid         | 97643  |
| CELECOXIB                      | NSAID                  | 146530 | IBUPROFEN (RX)               | NSAID                  | 83591  |
| IBUPROFEN (RX)                 | NSAID                  | 117025 | BUPROPION HCL XL             | Antidepressant         | 73148  |
| ASPIRIN (OTC)                  | NSAID                  | 73364  | TESTOSTERONE CYP             | Androgen               | 65830  |
| VENLAFAXINE HCL ER             | Antidepressant         | 70373  | TESTOSTERONE                 | Androgen               | 49001  |
| QUETIAPINE FUM                 | Atypical Antipsychotic | 66824  | QUETIAPINE FUM               | Atypical Antipsychotic | 44846  |
| HYDROXYCHLOROQUINE SULF        | Immunomodulator        | 64904  | DICLOFENAC SOD               | NSAID                  | 29737  |
| BUPROPION HCL SR               | Antidepressant         | 61264  | ASPIRIN                      | NSAID                  | 29206  |
| ARIPIRAZOLE                    | Atypical Antipsychotic | 51959  | BUPROPION HCL SR             | Antidepressant         | 27120  |
| DESVENLAFAXIN SUC ER           | Antidepressant         | 43660  | DEXAMETHASONE                | Corticosteroid         | 24792  |
| ANASTROZOLE                    | Antineoplastic Agent   | 37979  | ARIPIRAZOLE                  | Atypical Antipsychotic | 22872  |
| DEXAMETHASONE                  | Corticosteroid         | 35496  | HYDROXYCHLOROQUINE SULF      | Immunomodulator        | 19089  |
| DICLOFENAC SOD                 | NSAID                  | 32546  | VENLAFAXINE HCL ER           | Antidepressant         | 18966  |
| AMPHETAMINE SALTS              | Stimulant              | 31420  | BIKTARVY                     | Antiretroviral         | 17425  |
| LETROZOLE                      | Antineoplastic Agent   | 28321  | AMPHETAMINE SALTS            | Stimulant              | 14717  |
| <i>Females, ≥75 years</i>      |                        |        | <i>Males, ≥75 years</i>      |                        |        |
| ESTRADIOL                      | Estrogen-containing    | 209051 | PREDNISON                    | Corticosteroid         | 82478  |



|                         |                        |        |                         |                        |       |
|-------------------------|------------------------|--------|-------------------------|------------------------|-------|
| DULOXETINE HCL          | Antidepressant         | 174364 | DULOXETINE HCL          | Antidepressant         | 68986 |
| PREDNISON               | Corticosteroid         | 116562 | METHYLPREDNISOLONE      | Corticosteroid         | 67224 |
| METHYLPREDNISOLONE      | Corticosteroid         | 112267 | MELOXICAM               | NSAID                  | 51892 |
| CELECOXIB               | NSAID                  | 84935  | ASPIRIN (OTC)           | NSAID                  | 50153 |
| BUPROPION HCL XL        | Antidepressant         | 84081  | CELECOXIB               | NSAID                  | 49675 |
| MELOXICAM               | NSAID                  | 82693  | QUETIAPINE FUM          | Atypical Antipsychotic | 35330 |
| QUETIAPINE FUM          | Atypical Antipsychotic | 63555  | BUPROPION HCL XL        | Antidepressant         | 34433 |
| VENLAFAXINE HCL ER      | Antidepressant         | 49709  | IBUPROFEN (RX)          | NSAID                  | 25378 |
| ASPIRIN (OTC)           | NSAID                  | 49408  | DEXAMETHASONE           | Corticosteroid         | 22823 |
| HYDROXYCHLOROQUINE SULF | Immunomodulator        | 41816  | TESTOSTERONE CYP        | Androgen               | 22174 |
| IBUPROFEN (RX)          | NSAID                  | 41105  | TESTOSTERONE            | Androgen               | 21868 |
| ANASTROZOLE             | Antineoplastic Agent   | 33464  | VENLAFAXINE HCL ER      | Antidepressant         | 14017 |
| DEXAMETHASONE           | Corticosteroid         | 31107  | HYDROXYCHLOROQUINE SULF | Immunomodulator        | 12701 |
| BUPROPION HCL SR        | Antidepressant         | 26864  | BUPROPION HCL SR        | Antidepressant         | 12227 |
| LETROZOLE               | Antineoplastic Agent   | 24899  | METHOTREXATE SOD        | Antineoplastic Agent   | 11673 |
| ARIPIRAZOLE             | Atypical Antipsychotic | 23584  | DICLOFENAC SOD          | NSAID                  | 9686  |
| METHOTREXATE SOD        | Antineoplastic Agent   | 21136  | ARIPIRAZOLE             | Atypical Antipsychotic | 8617  |
| DESVENLAFAXIN SUC ER    | Antidepressant         | 17634  | OLANZAPINE              | Atypical Antipsychotic | 6976  |
| DICLOFENAC SOD          | NSAID                  | 14954  | HYDROCORTISONE          | Corticosteroid         | 6302  |

<sup>a</sup> Careful efforts were taken to remove topical products with limited systemic absorption. However, the results were generated at molecule level instead of therapeutic class and some topical products with limited systemic absorption were included. Topical isotretinoin, used for acne treatment, experienced the 11th and 10th largest increase in prescription fills Q1/2017 to Q4/2023 for females 0 to 17 years and males 0 to 17 years, respectively. Authors chose not to report these in the table as they are unlikely to cause clinically significant BP-elevation.

Table S5: Medication and therapeutic class of the antihypertensive medications that experienced largest increase in prescription fills by sex and age group from Q1/2017 to Q4/2023, IQVIA Total Patient Tracker

| Medication                     | Therapeutic class            | Change from Q1/2017 to Q4/2023 | Medication                   | Therapeutic Class            | Change from Q1/2017 to Q4/2023 |
|--------------------------------|------------------------------|--------------------------------|------------------------------|------------------------------|--------------------------------|
| <i>Females, 0 to 17 years</i>  |                              |                                | <i>Males, 0 to 17 years</i>  |                              |                                |
| SPIRONOLACTONE                 | Potassium sparing diuretic   | 39068                          | CLONIDINE HCL                | Centrally acting             | 6634                           |
| CLONIDINE HCL                  | Centrally acting             | 24485                          | PROPRANOLOL HCL              | Beta Blocker                 | 5013                           |
| PROPRANOLOL HCL                | Beta Blocker                 | 16289                          | PRAZOSIN HCL                 | Alpha-1 Blocker              | 3350                           |
| PRAZOSIN HCL                   | Alpha-1 Blocker              | 8476                           | SPIRONOLACTONE               | Potassium sparing diuretic   | 2602                           |
| METOPROLOL SUCCIN              | Beta Blocker                 | 1143                           | KATERZIA                     | Calcium Channel Blocker      | 1349                           |
| MINOXIDIL                      | Direct vasodilator           | 1016                           | MINOXIDIL                    | Direct vasodilator           | 1285                           |
| KATERZIA                       | Calcium Channel Blocker      | 836                            | LOSARTAN POT                 | Angiotensin Receptor Blocker | 1212                           |
| CAROSPIR                       | Potassium sparing diuretic   | 621                            | METOPROLOL SUCCIN            | Beta Blocker                 | 852                            |
| TELMISARTAN                    | Angiotensin Receptor Blocker | 572                            | CAROSPIR                     | Potassium sparing diuretic   | 761                            |
| LOSARTAN POT                   | Angiotensin Receptor Blocker | 535                            | AMLODIPINE BESY              | Calcium Channel Blocker      | 738                            |
| NADOLOL                        | Beta Blocker                 | 483                            | TELMISARTAN                  | Angiotensin Receptor Blocker | 520                            |
| NIFEDIPINE ER                  | Calcium Channel Blocker      | 317                            | NADOLOL                      | Beta Blocker                 | 444                            |
| QBRELIS                        | ACE inhibitor                | 227                            | ENTRESTO <sup>a</sup>        | Angiotensin Receptor Blocker | 421                            |
| ENTRESTO <sup>a</sup>          | Angiotensin Receptor Blocker | 219                            | EPLERENONE                   | Aldosterone antagonist       | 414                            |
| CLONIDINE                      | Centrally acting             | 208                            | QBRELIS                      | ACE inhibitor                | 352                            |
| DIURIL                         | Thiazide diuretic            | 188                            | IRBESARTAN                   | Angiotensin Receptor Blocker | 263                            |
| LABETALOL HCL                  | Beta Blocker                 | 166                            | CLONIDINE                    | Centrally acting             | 254                            |
| IRBESARTAN                     | Angiotensin Receptor Blocker | 135                            | DIURIL                       | Thiazide diuretic            | 156                            |
| NEBIVOLOL HCL                  | Beta Blocker                 | 98                             | NIFEDIPINE ER                | Calcium Channel Blocker      | 134                            |
| TERAZOSIN HCL                  | Alpha-1 Blocker              | 94                             | NORLIQVA                     | Calcium Channel Blocker      | 123                            |
| <i>Females, 18 to 44 years</i> |                              |                                | <i>Males, 18 to 44 years</i> |                              |                                |
| SPIRONOLACTONE                 | Potassium sparing diuretic   | 464710                         | LOSARTAN POT                 | Angiotensin Receptor Blocker | 258929                         |
| PROPRANOLOL HCL                | Beta Blocker                 | 285574                         | AMLODIPINE BESY              | Calcium Channel Blocker      | 204787                         |
| LOSARTAN POT                   | Angiotensin Receptor Blocker | 176515                         | PROPRANOLOL HCL              | Beta Blocker                 | 132546                         |
| AMLODIPINE BESY                | Calcium Channel Blocker      | 144392                         | METOPROLOL SUCCIN            | Beta Blocker                 | 102020                         |
| METOPROLOL SUCCIN              | Beta Blocker                 | 124624                         | SPIRONOLACTONE               | Potassium sparing diuretic   | 78606                          |

|                                       |                              |        |                                     |                              |        |
|---------------------------------------|------------------------------|--------|-------------------------------------|------------------------------|--------|
| NIFEDIPINE ER                         | Calcium Channel Blocker      | 105992 | MINOXIDIL                           | Direct vasodilator           | 66614  |
| PRAZOSIN HCL                          | Alpha-1 Blocker              | 91650  | OLMESARTAN MEDOX                    | Angiotensin Receptor Blocker | 48969  |
| LABETALOL HCL                         | Beta Blocker                 | 67585  | CLONIDINE HCL                       | Centrally acting             | 38326  |
| CLONIDINE HCL                         | Centrally acting             | 60576  | PRAZOSIN HCL                        | Alpha-1 Blocker              | 35423  |
| MINOXIDIL                             | Direct vasodilator           | 39552  | NEBIVOLOL HCL                       | Beta Blocker                 | 28327  |
| OLMESARTAN MEDOX                      | Angiotensin Receptor Blocker | 28228  | ENTRESTO <sup>a</sup>               | Angiotensin Receptor Blocker | 27607  |
| NEBIVOLOL HCL                         | Beta Blocker                 | 22262  | CHLORTHALIDONE                      | Thiazide diuretic            | 22483  |
| CHLORTHALIDONE                        | Thiazide diuretic            | 17442  | VALSARTAN                           | Angiotensin Receptor Blocker | 22037  |
| ENTRESTO <sup>a</sup>                 | Angiotensin Receptor Blocker | 14446  | NIFEDIPINE ER                       | Calcium Channel Blocker      | 19737  |
| GUANFACINE HCL                        | Centrally acting             | 12423  | CARVEDILOL                          | Beta Blocker                 | 18435  |
| VALSARTAN                             | Angiotensin Receptor Blocker | 11691  | LOSARTAN POT/HCTZ                   | Fixed dose combination       | 17542  |
| CARVEDILOL                            | Beta Blocker                 | 8601   | TELMISARTAN                         | Angiotensin Receptor Blocker | 14640  |
| OLMESARTAN/HCTZ                       | Fixed dose combination       | 7783   | OLMESARTAN/HCTZ                     | Fixed dose combination       | 12538  |
| TELMISARTAN                           | Angiotensin Receptor Blocker | 7219   | IRBESARTAN                          | Angiotensin Receptor Blocker | 9481   |
| IRBESARTAN                            | Angiotensin Receptor Blocker | 5689   | HYDRALAZINE HCL                     | Direct vasodilator           | 8476   |
| <b><i>Females, 45 to 64 years</i></b> |                              |        | <b><i>Males, 45 to 64 years</i></b> |                              |        |
| LOSARTAN POT                          | Angiotensin Receptor Blocker | 796198 | LOSARTAN POT                        | Angiotensin Receptor Blocker | 894373 |
| AMLODIPINE BESY                       | Calcium Channel Blocker      | 516875 | AMLODIPINE BESY                     | Calcium Channel Blocker      | 737399 |
| METOPROLOL SUCCIN                     | Beta Blocker                 | 402008 | METOPROLOL SUCCIN                   | Beta Blocker                 | 445671 |
| SPIRONOLACTONE                        | Potassium sparing diuretic   | 222838 | OLMESARTAN MEDOX                    | Angiotensin Receptor Blocker | 203785 |
| OLMESARTAN MEDOX                      | Angiotensin Receptor Blocker | 160065 | ENTRESTO <sup>a</sup>               | Angiotensin Receptor Blocker | 154842 |
| PROPRANOLOL HCL                       | Beta Blocker                 | 131120 | NEBIVOLOL HCL                       | Beta Blocker                 | 127148 |
| NEBIVOLOL HCL                         | Beta Blocker                 | 101092 | SPIRONOLACTONE                      | Potassium sparing diuretic   | 116523 |
| CHLORTHALIDONE                        | Thiazide diuretic            | 81814  | CHLORTHALIDONE                      | Thiazide diuretic            | 99522  |
| ENTRESTO <sup>a</sup>                 | Angiotensin Receptor Blocker | 71882  | NIFEDIPINE ER                       | Calcium Channel Blocker      | 66235  |
| MINOXIDIL                             | Direct vasodilator           | 67927  | PROPRANOLOL HCL                     | Beta Blocker                 | 60708  |
| PRAZOSIN HCL                          | Alpha-1 Blocker              | 50049  | TELMISARTAN                         | Angiotensin Receptor Blocker | 60546  |
| OLMESARTAN/HCTZ                       | Fixed dose combination       | 49243  | OLMESARTAN/HCTZ                     | Fixed dose combination       | 60331  |
| NIFEDIPINE ER                         | Calcium Channel Blocker      | 48635  | VALSARTAN                           | Angiotensin Receptor Blocker | 53239  |
| TELMISARTAN                           | Angiotensin Receptor Blocker | 48067  | HYDROCHLOROTHIAZIDE                 | Thiazide diuretic            | 51199  |
| IRBESARTAN                            | Angiotensin Receptor Blocker | 30198  | HYDRALAZINE HCL                     | Direct vasodilator           | 44823  |
| CARVEDILOL                            | Beta Blocker                 | 25455  | CARVEDILOL                          | Beta Blocker                 | 42249  |
| HYDRALAZINE HCL                       | Direct vasodilator           | 19347  | IRBESARTAN                          | Angiotensin Receptor Blocker | 42162  |
| TORSEMIDE                             | Loop diuretic                | 19011  | MINOXIDIL                           | Direct vasodilator           | 30737  |

|                                |                              |        |                              |                              |        |
|--------------------------------|------------------------------|--------|------------------------------|------------------------------|--------|
| BISOPROLOL FUM                 | Beta Blocker                 | 16732  | TORSEMIDE                    | Loop diuretic                | 29603  |
| VALSARTAN                      | Angiotensin Receptor Blocker | 15985  | PRAZOSIN HCL                 | Alpha-1 Blocker              | 27151  |
| <i>Females, 65 to 74 years</i> |                              |        | <i>Males, 65 to 74 years</i> |                              |        |
| LOSARTAN POT                   | Angiotensin Receptor Blocker | 711874 | AMLODIPINE BESY              | Calcium Channel Blocker      | 766355 |
| AMLODIPINE BESY                | Calcium Channel Blocker      | 630219 | LOSARTAN POT                 | Angiotensin Receptor Blocker | 678788 |
| METOPROLOL SUCCIN              | Beta Blocker                 | 493972 | METOPROLOL SUCCIN            | Beta Blocker                 | 559183 |
| HYDROCHLOROTHIAZIDE            | Thiazide diuretic            | 185653 | LISINOPRIL                   | ACE inhibitor                | 254642 |
| OLMESARTAN MEDOX               | Angiotensin Receptor Blocker | 144577 | HYDROCHLOROTHIAZIDE          | Thiazide diuretic            | 170986 |
| SPIRONOLACTONE                 | Potassium sparing diuretic   | 137015 | OLMESARTAN MEDOX             | Angiotensin Receptor Blocker | 133314 |
| LISINOPRIL                     | ACE inhibitor                | 135118 | CARVEDILOL                   | Beta Blocker                 | 122923 |
| CARVEDILOL                     | Beta Blocker                 | 85694  | SPIRONOLACTONE               | Potassium sparing diuretic   | 120404 |
| NEBIVOLOL HCL                  | Beta Blocker                 | 75283  | ENTRESTO <sup>a</sup>        | Angiotensin Receptor Blocker | 118650 |
| CHLORTHALIDONE                 | Thiazide diuretic            | 64897  | CHLORTHALIDONE               | Thiazide diuretic            | 74453  |
| ENTRESTO <sup>a</sup>          | Angiotensin Receptor Blocker | 61928  | NEBIVOLOL HCL                | Beta Blocker                 | 72766  |
| PROPRANOLOL HCL                | Beta Blocker                 | 58329  | HYDRALAZINE HCL              | Direct vasodilator           | 56386  |
| TELMISARTAN                    | Angiotensin Receptor Blocker | 51710  | NIFEDIPINE ER                | Calcium Channel Blocker      | 50499  |
| IRBESARTAN                     | Angiotensin Receptor Blocker | 43662  | VALSARTAN                    | Angiotensin Receptor Blocker | 48777  |
| NIFEDIPINE ER                  | Calcium Channel Blocker      | 42083  | IRBESARTAN                   | Angiotensin Receptor Blocker | 48136  |
| DILTIAZEM HCL                  | Calcium Channel Blocker      | 40548  | TELMISARTAN                  | Angiotensin Receptor Blocker | 46732  |
| OLMESARTAN/HCTZ                | Fixed dose combination       | 39950  | DILTIAZEM HCL                | Calcium Channel Blocker      | 41281  |
| HYDRALAZINE HCL                | Direct vasodilator           | 38647  | PROPRANOLOL HCL              | Beta Blocker                 | 34631  |
| MINOXIDIL                      | Direct vasodilator           | 34245  | OLMESARTAN/HCTZ              | Fixed dose combination       | 34431  |
| TORSEMIDE                      | Loop diuretic                | 25171  | TORSEMIDE                    | Loop diuretic                | 32053  |
| <i>Females, ≥75 years</i>      |                              |        | <i>Males, ≥75 years</i>      |                              |        |
| LOSARTAN POT                   | Angiotensin Receptor Blocker | 702457 | AMLODIPINE BESY              | Calcium Channel Blocker      | 538175 |
| AMLODIPINE BESY                | Calcium Channel Blocker      | 678716 | METOPROLOL SUCCIN            | Beta Blocker                 | 497058 |
| METOPROLOL SUCCIN              | Beta Blocker                 | 592094 | LOSARTAN POT                 | Angiotensin Receptor Blocker | 467857 |
| HYDROCHLOROTHIAZIDE            | Thiazide diuretic            | 170411 | LISINOPRIL                   | ACE inhibitor                | 136042 |
| SPIRONOLACTONE                 | Potassium sparing diuretic   | 153708 | HYDROCHLOROTHIAZIDE          | Thiazide diuretic            | 108846 |
| OLMESARTAN MEDOX               | Angiotensin Receptor Blocker | 132549 | ENTRESTO <sup>a</sup>        | Angiotensin Receptor Blocker | 102467 |
| CARVEDILOL                     | Beta Blocker                 | 129697 | SPIRONOLACTONE               | Potassium sparing diuretic   | 98466  |
| LISINOPRIL                     | ACE inhibitor                | 122069 | CARVEDILOL                   | Beta Blocker                 | 87856  |
| HYDRALAZINE HCL                | Direct vasodilator           | 81316  | OLMESARTAN MEDOX             | Angiotensin Receptor Blocker | 81429  |

|                       |                              |       |                 |                              |       |
|-----------------------|------------------------------|-------|-----------------|------------------------------|-------|
| NEBIVOLOL HCL         | Beta Blocker                 | 78848 | HYDRALAZINE HCL | Direct vasodilator           | 58709 |
| ENTRESTO <sup>a</sup> | Angiotensin Receptor Blocker | 78416 | TORSEMIDE       | Loop diuretic                | 50542 |
| TORSEMIDE             | Loop diuretic                | 58771 | NEBIVOLOL HCL   | Beta Blocker                 | 44623 |
| IRBESARTAN            | Angiotensin Receptor Blocker | 57818 | CHLORTHALIDONE  | Thiazide diuretic            | 43079 |
| DILTIAZEM HCL         | Calcium Channel Blocker      | 56080 | IRBESARTAN      | Angiotensin Receptor Blocker | 41266 |
| CHLORTHALIDONE        | Thiazide diuretic            | 51732 | FUROSEMIDE      | Loop diuretic                | 38390 |
| TELMISARTAN           | Angiotensin Receptor Blocker | 50952 | DILTIAZEM HCL   | Calcium Channel Blocker      | 35862 |
| NIFEDIPINE ER         | Calcium Channel Blocker      | 47353 | NIFEDIPINE ER   | Calcium Channel Blocker      | 34129 |
| PROPRANOLOL HCL       | Beta Blocker                 | 42898 | TELMISARTAN     | Angiotensin Receptor Blocker | 32279 |
| BUMETANIDE            | Loop diuretic                | 29019 | BUMETANIDE      | Loop diuretic                | 27140 |
| FUROSEMIDE            | Loop diuretic                | 28659 | VALSARTAN       | Angiotensin Receptor Blocker | 23875 |

<sup>a</sup>The therapeutic class reported is based on the antihypertensive component(s) of medications. Entresto (valsartan/sacubitril) is an Angiotensin Receptor Blocker/Neprilysin Inhibitor combination.

Table S6: Medication and therapeutic class of the BP-elevating medications with highest number of prescription fills by sex and age group in Q4/2023, IQVIA Total Patient Tracker

| Medication                     | Therapeutic class      | Count Q4/2023 | Medication                   | Therapeutic class      | Count Q4/2023 |
|--------------------------------|------------------------|---------------|------------------------------|------------------------|---------------|
| <b>Females, 0 to 17 years</b>  |                        |               | <b>Males, 0 to 17 years</b>  |                        |               |
| PREDNISOLONE S PH              | Corticosteroid         | 435575        | PREDNISOLONE S PH            | Corticosteroid         | 544427        |
| IBUPROFEN (RX)                 | NSAID                  | 384712        | IBUPROFEN (RX)               | NSAID                  | 414250        |
| PREDNISONONE                   | Corticosteroid         | 275000        | METHYLPHENIDATE ER           | Stimulant              | 343791        |
| PREDNISOLONE                   | Corticosteroid         | 241247        | PREDNISOLONE                 | Corticosteroid         | 299647        |
| IBUPROFEN (RX)                 | NSAID                  | 197233        | PREDNISONONE                 | Corticosteroid         | 292619        |
| METHYLPHENIDATE ER             | Stimulant              | 170030        | DEXMETHYLPHEN ER             | Stimulant              | 233566        |
| AMPHETAMIN SALT ER             | Stimulant              | 119640        | AMPHETAMIN SALT ER           | Stimulant              | 220140        |
| DEXMETHYLPHEN ER               | Stimulant              | 107071        | VYVANSE                      | Stimulant              | 198615        |
| VYVANSE                        | Stimulant              | 99225         | METHYLPHENIDATE              | Stimulant              | 193749        |
| LISDEXAMFETAMIN DI             | Stimulant              | 91105         | LISDEXAMFETAMIN DI           | Stimulant              | 169244        |
| ARIPIRAZOLE                    | Atypical Antipsychotic | 91062         | IBUPROFEN (RX)               | NSAID                  | 168477        |
| METHYLPHENIDATE                | Stimulant              | 87063         | AMPHETAMINE SALTS            | Stimulant              | 139757        |
| DEXAMETHASONE                  | Corticosteroid         | 75075         | ARIPIRAZOLE                  | Atypical Antipsychotic | 113029        |
| AMPHETAMINE SALTS              | Stimulant              | 73134         | CONCERTA                     | Stimulant              | 108943        |
| NAPROXEN                       | NSAID                  | 72704         | RISPERIDONE                  | Atypical Antipsychotic | 106518        |
| METHYLPREDNISOLONE             | Corticosteroid         | 67397         | DEXAMETHASONE                | Corticosteroid         | 99412         |
| CONCERTA                       | Stimulant              | 51352         | ADDERALL XR                  | Stimulant              | 80074         |
| BUPROPION HCL XL               | Antidepressant         | 49948         | DEXMETHYLPHEN HCL            | Stimulant              | 79444         |
| IBUPROFEN (OTC) CHILD          | NSAID                  | 43966         | METHYLPREDNISOLONE           | Corticosteroid         | 57411         |
| RISPERIDONE                    | Atypical Antipsychotic | 43410         | METHYLPHEN HCL CD            | Stimulant              | 55752         |
| <b>Females, 18 to 44 years</b> |                        |               | <b>Males, 18 to 44 years</b> |                        |               |
| PREDNISONONE                   | Corticosteroid         | 1866128       | PREDNISONONE                 | Corticosteroid         | 1072851       |
| IBUPROFEN (RX)                 | NSAID                  | 1698300       | AMPHETAMINE SALTS            | Stimulant              | 763920        |
| BUPROPION HCL XL               | Antidepressant         | 1292838       | IBUPROFEN (RX)               | NSAID                  | 723101        |
| METHYLPREDNISOLONE             | Corticosteroid         | 1063502       | METHYLPREDNISOLONE           | Corticosteroid         | 597507        |
| AMPHETAMINE SALTS              | Stimulant              | 1009522       | BUPROPION HCL XL             | Antidepressant         | 590896        |
| AMPHETAMIN SALT ER             | Stimulant              | 602975        | AMPHETAMIN SALT ER           | Stimulant              | 459008        |

|                                |                        |         |                              |                        |         |
|--------------------------------|------------------------|---------|------------------------------|------------------------|---------|
| DULOXETINE HCL                 | Antidepressant         | 518251  | MELOXICAM                    | NSAID                  | 327831  |
| NAPROXEN                       | NSAID                  | 516225  | NAPROXEN                     | NSAID                  | 318971  |
| PHENTERMINE HCL                | Stimulant              | 511821  | LISDEXAMFETAMIN DI           | Stimulant              | 271341  |
| VENLAFAXINE HCL ER             | Antidepressant         | 508904  | QUETIAPINE FUM               | Atypical Antipsychotic | 254835  |
| MELOXICAM                      | NSAID                  | 464749  | TESTOSTERONE CYP             | Androgen               | 247088  |
| LISDEXAMFETAMIN DI             | Stimulant              | 396720  | ARIPIRAZOLE                  | Atypical Antipsychotic | 236512  |
| ARIPIRAZOLE                    | Atypical Antipsychotic | 383398  | DULOXETINE HCL               | Antidepressant         | 200094  |
| QUETIAPINE FUM                 | Atypical Antipsychotic | 353970  | VENLAFAXINE HCL ER           | Antidepressant         | 199798  |
| LO LOESTRIN FE                 | Estrogen-containing    | 302597  | VYVANSE                      | Stimulant              | 184307  |
| DROSPIR-ETHYL ESTR             | Estrogen-containing    | 293462  | METHYLPHENIDATE ER           | Stimulant              | 151617  |
| VYVANSE                        | Stimulant              | 279931  | DICLOFENAC SOD               | NSAID                  | 135579  |
| AMITRIPTYLINE HCL              | Antidepressant         | 277889  | OLANZAPINE                   | Atypical Antipsychotic | 130353  |
| NORGEST/ETH ESTR               | Estrogen-containing    | 245640  | EMTRICITABINE/TENO           | Antiretroviral         | 129456  |
| ESTARYLLA                      | Estrogen-containing    | 243024  | RISPERIDONE                  | Atypical Antipsychotic | 129207  |
| <i>Females, 45 to 64 years</i> |                        |         | <i>Males, 45 to 64 years</i> |                        |         |
| PREDNISONE                     | Corticosteroid         | 1929863 | PREDNISONE                   | Corticosteroid         | 1205344 |
| MELOXICAM                      | NSAID                  | 1266007 | MELOXICAM                    | NSAID                  | 831341  |
| METHYLPREDNISOLONE             | Corticosteroid         | 1161079 | METHYLPREDNISOLONE           | Corticosteroid         | 699364  |
| BUPROPION HCL XL               | Antidepressant         | 1153542 | IBUPROFEN (RX)               | NSAID                  | 672217  |
| IBUPROFEN (RX)                 | NSAID                  | 1133475 | TESTOSTERONE CYP             | Androgen               | 491080  |
| DULOXETINE HCL                 | Antidepressant         | 1056946 | BUPROPION HCL XL             | Antidepressant         | 463130  |
| ESTRADIOL                      | Estrogen-containing    | 1047829 | DULOXETINE HCL               | Antidepressant         | 396861  |
| VENLAFAXINE HCL ER             | Antidepressant         | 691401  | ASPIRIN (OTC)                | NSAID                  | 352270  |
| NAPROXEN                       | NSAID                  | 504975  | NAPROXEN                     | NSAID                  | 347147  |
| PHENTERMINE HCL                | Stimulant              | 504930  | CELECOXIB                    | NSAID                  | 294322  |
| CELECOXIB                      | NSAID                  | 482086  | ASPIRIN                      | NSAID                  | 282042  |
| AMITRIPTYLINE HCL              | Antidepressant         | 439097  | DICLOFENAC SOD               | NSAID                  | 275794  |
| AMPHETAMINE SALTS              | Stimulant              | 427147  | AMPHETAMINE SALTS            | Stimulant              | 249531  |
| ESTRADIOL TRANSDML             | Estrogen-containing    | 410865  | QUETIAPINE FUM               | Atypical Antipsychotic | 246079  |
| DICLOFENAC SOD                 | NSAID                  | 397382  | VENLAFAXINE HCL ER           | Antidepressant         | 194239  |
| QUETIAPINE FUM                 | Atypical Antipsychotic | 387497  | AMITRIPTYLINE HCL            | Antidepressant         | 166739  |
| HYDROXYCHLOROQUINE SULF        | Immunomodulator        | 337405  | ARIPIRAZOLE                  | Atypical Antipsychotic | 144902  |
| ARIPIRAZOLE                    | Atypical Antipsychotic | 293507  | TESTOSTERONE                 | Androgen               | 125780  |

|                                |                        |        |                              |                        |        |
|--------------------------------|------------------------|--------|------------------------------|------------------------|--------|
| ASPIRIN (OTC)                  | NSAID                  | 273755 | AMPHETAMIN SALT ER           | Stimulant              | 112729 |
| BUPROPION HCL SR               | Antidepressant         | 215293 | ANASTROZOLE                  | Antineoplastic Agent   | 103025 |
| <i>Females, 65 to 74 years</i> |                        |        | <i>Males, 65 to 74 years</i> |                        |        |
| PREDNISON                      | Corticosteroid         | 939138 | PREDNISON                    | Corticosteroid         | 656500 |
| MELOXICAM                      | NSAID                  | 688395 | MELOXICAM                    | NSAID                  | 435490 |
| DULOXETINE HCL                 | Antidepressant         | 537002 | METHYLPREDNISOLONE           | Corticosteroid         | 329538 |
| METHYLPREDNISOLONE             | Corticosteroid         | 516385 | DULOXETINE HCL               | Antidepressant         | 211470 |
| ESTRADIOL                      | Estrogen-containing    | 469307 | IBUPROFEN (RX)               | NSAID                  | 208765 |
| BUPROPION HCL XL               | Antidepressant         | 366940 | ASPIRIN (OTC)                | NSAID                  | 208412 |
| IBUPROFEN (RX)                 | NSAID                  | 323798 | CELECOXIB                    | NSAID                  | 196033 |
| CELECOXIB                      | NSAID                  | 314056 | ASPIRIN                      | NSAID                  | 177253 |
| VENLAFAXINE HCL ER             | Antidepressant         | 271953 | BUPROPION HCL XL             | Antidepressant         | 151225 |
| AMITRIPTYLINE HCL              | Antidepressant         | 197737 | TESTOSTERONE CYP             | Androgen               | 129210 |
| ASPIRIN (OTC)                  | NSAID                  | 194787 | NAPROXEN                     | NSAID                  | 121797 |
| NAPROXEN                       | NSAID                  | 170625 | DICLOFENAC SOD               | NSAID                  | 118091 |
| DICLOFENAC SOD                 | NSAID                  | 168359 | QUETIAPINE FUM               | Atypical Antipsychotic | 99805  |
| HYDROXYCHLOROQUINE SULF        | Immunomodulator        | 167472 | AMITRIPTYLINE HCL            | Antidepressant         | 81841  |
| ASPIRIN                        | NSAID                  | 160107 | VENLAFAXINE HCL ER           | Antidepressant         | 80207  |
| QUETIAPINE FUM                 | Atypical Antipsychotic | 157751 | METHOTREXATE SOD             | Antineoplastic Agent   | 62495  |
| ANASTROZOLE                    | Antineoplastic Agent   | 142441 | TESTOSTERONE                 | Androgen               | 61062  |
| METHOTREXATE SOD               | Antineoplastic Agent   | 132044 | DEXAMETHASONE                | Corticosteroid         | 55436  |
| ARIPIRAZOLE                    | Atypical Antipsychotic | 97046  | HYDROXYCHLOROQUINE SULF      | Immunomodulator        | 43106  |
| BUPROPION HCL SR               | Antidepressant         | 83724  | ARIPIRAZOLE                  | Atypical Antipsychotic | 41457  |
| <i>Females, ≥75 years</i>      |                        |        | <i>Males, ≥75 years</i>      |                        |        |
| PREDNISON                      | Corticosteroid         | 681252 | PREDNISON                    | Corticosteroid         | 466417 |
| MELOXICAM                      | NSAID                  | 385222 | METHYLPREDNISOLONE           | Corticosteroid         | 200202 |
| DULOXETINE HCL                 | Antidepressant         | 341688 | MELOXICAM                    | NSAID                  | 193490 |
| METHYLPREDNISOLONE             | Corticosteroid         | 318156 | ASPIRIN (OTC)                | NSAID                  | 130279 |
| ESTRADIOL                      | Estrogen-containing    | 268391 | DULOXETINE HCL               | Antidepressant         | 124788 |
| CELECOXIB                      | NSAID                  | 213635 | ASPIRIN                      | NSAID                  | 109202 |
| ASPIRIN (OTC)                  | NSAID                  | 179290 | CELECOXIB                    | NSAID                  | 106621 |
| QUETIAPINE FUM                 | Atypical Antipsychotic | 163389 | QUETIAPINE FUM               | Atypical Antipsychotic | 87685  |



|                         |                      |        |                         |                        |       |
|-------------------------|----------------------|--------|-------------------------|------------------------|-------|
| ASPIRIN                 | NSAID                | 144468 | IBUPROFEN (RX)          | NSAID                  | 69152 |
| BUPROPION HCL XL        | Antidepressant       | 132368 | BUPROPION HCL XL        | Antidepressant         | 58665 |
| VENLAFAXINE HCL ER      | Antidepressant       | 130093 | NAPROXEN                | NSAID                  | 45864 |
| IBUPROFEN (RX)          | NSAID                | 120923 | DEXAMETHASONE           | Corticosteroid         | 44183 |
| AMITRIPTYLINE HCL       | Antidepressant       | 113547 | DICLOFENAC SOD          | NSAID                  | 43973 |
| ANASTROZOLE             | Antineoplastic Agent | 106557 | TESTOSTERONE CYP        | Androgen               | 41276 |
| HYDROXYCHLOROQUINE SULF | Immunomodulator      | 97833  | METHOTREXATE SOD        | Antineoplastic Agent   | 40960 |
| METHOTREXATE SOD        | Antineoplastic Agent | 94993  | VENLAFAXINE HCL ER      | Antidepressant         | 40635 |
| NAPROXEN                | NSAID                | 75871  | AMITRIPTYLINE HCL       | Antidepressant         | 39222 |
| DICLOFENAC SOD          | NSAID                | 74963  | HYDROXYCHLOROQUINE SULF | Immunomodulator        | 27726 |
| RALOXIFENE HCL          | Antineoplastic Agent | 67081  | TESTOSTERONE            | Androgen               | 25484 |
| LETROZOLE               | Antineoplastic Agent | 56869  | OLANZAPINE              | Atypical Antipsychotic | 18410 |

Table S7: Medication and therapeutic class of the antihypertensive medications with highest number of prescription fills by sex and age group in Q4/2023, IQVIA Total Patient Tracker

| Medication                     | Therapeutic class            | Count Q4/2023 | Medication                   | Therapeutic class            | Count Q4/2023 |
|--------------------------------|------------------------------|---------------|------------------------------|------------------------------|---------------|
| <i>Females, 0 to 17 years</i>  |                              |               | <i>Males, 0 to 17 years</i>  |                              |               |
| CLONIDINE HCL                  | Centrally acting             | 147194        | CLONIDINE HCL                | Centrally acting             | 275839        |
| SPIRONOLACTONE                 | Potassium sparing diuretic   | 55451         | GUANFACINE HCL               | Centrally acting             | 130000        |
| GUANFACINE HCL                 | Centrally acting             | 52015         | PROPRANOLOL HCL              | Beta Blocker                 | 19067         |
| PROPRANOLOL HCL                | Beta Blocker                 | 36909         | LISINOPRIL                   | ACE inhibitor                | 15945         |
| PRAZOSIN HCL                   | Alpha-1 Blocker              | 17552         | ENALAPRIL MAL                | ACE inhibitor                | 9584          |
| LISINOPRIL                     | ACE inhibitor                | 8882          | AMLODIPINE BESY              | Calcium Channel Blocker      | 8739          |
| ENALAPRIL MAL                  | ACE inhibitor                | 7140          | PRAZOSIN HCL                 | Alpha-1 Blocker              | 7245          |
| AMLODIPINE BESY                | Calcium Channel Blocker      | 6449          | FUROSEMIDE                   | Loop diuretic                | 6916          |
| ATENOLOL                       | Beta Blocker                 | 6326          | SPIRONOLACTONE               | Loop diuretic                | 6145          |
| FUROSEMIDE                     | Loop diuretic                | 5871          | ATENOLOL                     | Beta Blocker                 | 5300          |
| METOPROLOL SUCCIN              | Beta Blocker                 | 3021          | LOSARTAN POT                 | Angiotensin Receptor Blocker | 4809          |
| LOSARTAN POT                   | Angiotensin Receptor Blocker | 2845          | METOPROLOL SUCCIN            | Beta Blocker                 | 2539          |
| NADOLOL                        | Beta Blocker                 | 2331          | NADOLOL                      | Beta Blocker                 | 2246          |
| HYDROCHLOROTHIAZIDE            | Thiazide diuretic            | 1283          | HYDROCHLOROTHIAZIDE          | Thiazide diuretic            | 1726          |
| METOPROLOL TART                | Beta Blocker                 | 1123          | MINOXIDIL                    | Direct vasodilator           | 1354          |
| MINOXIDIL                      | Direct vasodilator           | 1048          | KATERZIA                     | Calcium Channel Blocker      | 1349          |
| BENAZEPRIL HCL                 | ACE inhibitor                | 935           | CARVEDILOL                   | Beta Blocker                 | 1292          |
| NIFEDIPINE ER                  | Calcium Channel Blocker      | 881           | CLONIDINE                    | Centrally acting             | 1181          |
| KATERZIA                       | Calcium Channel Blocker      | 836           | BENAZEPRIL HCL               | ACE inhibitor                | 1054          |
| DIURIL                         | Thiazide diuretic            | 769           | DIURIL                       | Thiazide diuretic            | 942           |
| <i>Females, 18 to 44 years</i> |                              |               | <i>Males, 18 to 44 years</i> |                              |               |
| SPIRONOLACTONE                 | Potassium sparing diuretic   | 872348        | LISINOPRIL                   | ACE inhibitor                | 831620        |
| PROPRANOLOL HCL                | Beta Blocker                 | 546239        | AMLODIPINE BESY              | Calcium Channel Blocker      | 633869        |
| AMLODIPINE BESY                | Calcium Channel Blocker      | 484185        | LOSARTAN POT                 | Angiotensin Receptor Blocker | 495211        |
| LISINOPRIL                     | ACE inhibitor                | 473787        | METOPROLOL SUCCIN            | Beta Blocker                 | 282295        |
| LOSARTAN POT                   | Angiotensin Receptor Blocker | 356734        | PROPRANOLOL HCL              | Beta Blocker                 | 267743        |
| HYDROCHLOROTHIAZIDE            | Thiazide diuretic            | 339435        | HYDROCHLOROTHIAZIDE          | Thiazide diuretic            | 239617        |

|                                |                              |         |                              |                              |         |
|--------------------------------|------------------------------|---------|------------------------------|------------------------------|---------|
| METOPROLOL SUCCIN              | Beta Blocker                 | 329825  | CLONIDINE HCL                | Centrally acting             | 174697  |
| LABETALOL HCL                  | Beta Blocker                 | 191723  | LISINOPRIL/HCTZ              | Fixed dose combination       | 151539  |
| CLONIDINE HCL                  | Centrally acting             | 182962  | SPIRONOLACTONE               | Potassium sparing diuretic   | 131895  |
| PRAZOSIN HCL                   | Alpha-1 Blocker              | 169297  | CARVEDILOL                   | Beta Blocker                 | 119047  |
| NIFEDIPINE ER                  | Calcium Channel Blocker      | 166151  | LOSARTAN POT/HCTZ            | Fixed dose combination       | 108888  |
| METOPROLOL TART                | Beta Blocker                 | 122684  | METOPROLOL TART              | Beta Blocker                 | 102880  |
| FUROSEMIDE                     | Loop diuretic                | 117964  | FUROSEMIDE                   | Loop diuretic                | 77349   |
| LISINOPRIL/HCTZ                | Fixed dose combination       | 99819   | MINOXIDIL                    | Direct vasodilator           | 71504   |
| LOSARTAN POT/HCTZ              | Fixed dose combination       | 85916   | PRAZOSIN HCL                 | Alpha-1 Blocker              | 68796   |
| ATENOLOL                       | Beta Blocker                 | 80602   | ATENOLOL                     | Beta Blocker                 | 61418   |
| CARVEDILOL                     | Beta Blocker                 | 79709   | VALSARTAN                    | Angiotensin Receptor Blocker | 61109   |
| CHLORTHALIDONE                 | Thiazide diuretic            | 46790   | OLMESARTAN MEDOX             | Angiotensin Receptor Blocker | 58393   |
| MINOXIDIL                      | Direct vasodilator           | 40900   | CHLORTHALIDONE               | Thiazide diuretic            | 51159   |
| VALSARTAN                      | Angiotensin Receptor Blocker | 36166   | NIFEDIPINE ER                | Calcium Channel Blocker      | 41906   |
| <b>Females, 45 to 64 years</b> |                              |         | <b>Males, 45 to 64 years</b> |                              |         |
| AMLODIPINE BESY                | Calcium Channel Blocker      | 2373740 | LISINOPRIL                   | ACE inhibitor                | 3110829 |
| LISINOPRIL                     | ACE inhibitor                | 2252851 | AMLODIPINE BESY              | Calcium Channel Blocker      | 2921428 |
| LOSARTAN POT                   | Angiotensin Receptor Blocker | 1992193 | LOSARTAN POT                 | Angiotensin Receptor Blocker | 2050941 |
| HYDROCHLOROTHIAZIDE            | Thiazide diuretic            | 1571096 | METOPROLOL SUCCIN            | Beta Blocker                 | 1440407 |
| METOPROLOL SUCCIN              | Beta Blocker                 | 1317697 | HYDROCHLOROTHIAZIDE          | Thiazide diuretic            | 1112971 |
| FUROSEMIDE                     | Loop diuretic                | 609657  | CARVEDILOL                   | Beta Blocker                 | 723904  |
| SPIRONOLACTONE                 | Potassium sparing diuretic   | 600942  | LISINOPRIL/HCTZ              | Fixed dose combination       | 660509  |
| LISINOPRIL/HCTZ                | Fixed dose combination       | 578842  | METOPROLOL TART              | Beta Blocker                 | 600966  |
| METOPROLOL TART                | Beta Blocker                 | 551531  | FUROSEMIDE                   | Loop diuretic                | 513197  |
| LOSARTAN POT/HCTZ              | Fixed dose combination       | 490902  | LOSARTAN POT/HCTZ            | Fixed dose combination       | 473500  |
| CARVEDILOL                     | Beta Blocker                 | 472397  | SPIRONOLACTONE               | Potassium sparing diuretic   | 349508  |
| PROPRANOLOL HCL                | Beta Blocker                 | 428901  | VALSARTAN                    | Angiotensin Receptor Blocker | 287140  |
| ATENOLOL                       | Beta Blocker                 | 349616  | OLMESARTAN MEDOX             | Angiotensin Receptor Blocker | 261095  |
| TRIAMTERENE/HCTZ               | Fixed dose combination       | 249982  | ATENOLOL                     | Beta Blocker                 | 258732  |
| VALSARTAN                      | Angiotensin Receptor Blocker | 225777  | CHLORTHALIDONE               | Thiazide diuretic            | 230906  |
| CLONIDINE HCL                  | Centrally acting             | 223830  | PROPRANOLOL HCL              | Beta Blocker                 | 215643  |
| CHLORTHALIDONE                 | Thiazide diuretic            | 210965  | HYDRALAZINE HCL              | Direct vasodilator           | 193884  |
| OLMESARTAN MEDOX               | Angiotensin Receptor Blocker | 206563  | NIFEDIPINE ER                | Calcium Channel Blocker      | 185629  |

|                                       |                              |         |                                     |                              |         |
|---------------------------------------|------------------------------|---------|-------------------------------------|------------------------------|---------|
| NIFEDIPINE ER                         | Calcium Channel Blocker      | 159090  | CLONIDINE HCL                       | Centrally acting             | 182150  |
| DILTIAZEM HCL                         | Calcium Channel Blocker      | 156467  | AMLODIP BES/BENAZ HCL               | Fixed dose combination       | 181842  |
| <b><i>Females, 65 to 74 years</i></b> |                              |         | <b><i>Males, 65 to 74 years</i></b> |                              |         |
| AMLODIPINE BESY                       | Calcium Channel Blocker      | 2042210 | AMLODIPINE BESY                     | Calcium Channel Blocker      | 2047614 |
| LOSARTAN POT                          | Angiotensin Receptor Blocker | 1644259 | LISINOPRIL                          | ACE inhibitor                | 1828706 |
| LISINOPRIL                            | ACE inhibitor                | 1560881 | LOSARTAN POT                        | Angiotensin Receptor Blocker | 1381379 |
| METOPROLOL SUCCIN                     | Beta Blocker                 | 1212471 | METOPROLOL SUCCIN                   | Beta Blocker                 | 1257325 |
| HYDROCHLOROTHIAZIDE                   | Thiazide diuretic            | 1094635 | HYDROCHLOROTHIAZIDE                 | Thiazide diuretic            | 748562  |
| FUROSEMIDE                            | Loop diuretic                | 597298  | CARVEDILOL                          | Beta Blocker                 | 617925  |
| METOPROLOL TART                       | Beta Blocker                 | 533629  | METOPROLOL TART                     | Beta Blocker                 | 556908  |
| CARVEDILOL                            | Beta Blocker                 | 484265  | FUROSEMIDE                          | Loop diuretic                | 516223  |
| LISINOPRIL/HCTZ                       | Fixed dose combination       | 347702  | LISINOPRIL/HCTZ                     | Fixed dose combination       | 340471  |
| LOSARTAN POT/HCTZ                     | Fixed dose combination       | 332947  | SPIRONOLACTONE                      | Potassium sparing diuretic   | 270614  |
| SPIRONOLACTONE                        | Potassium sparing diuretic   | 328881  | LOSARTAN POT/HCTZ                   | Fixed dose combination       | 259846  |
| ATENOLOL                              | Beta Blocker                 | 328393  | ATENOLOL                            | Beta Blocker                 | 213155  |
| VALSARTAN                             | Angiotensin Receptor Blocker | 207627  | VALSARTAN                           | Angiotensin Receptor Blocker | 199638  |
| TRIAMTERENE/HCTZ                      | Fixed dose combination       | 203198  | OLMESARTAN MEDOX                    | Angiotensin Receptor Blocker | 163034  |
| DILTIAZEM HCL                         | Calcium Channel Blocker      | 189023  | HYDRALAZINE HCL                     | Direct vasodilator           | 162156  |
| OLMESARTAN MEDOX                      | Angiotensin Receptor Blocker | 179950  | DILTIAZEM HCL                       | Calcium Channel Blocker      | 153704  |
| PROPRANOLOL HCL                       | Beta Blocker                 | 178346  | CHLORTHALIDONE                      | Thiazide diuretic            | 145105  |
| HYDRALAZINE HCL                       | Direct vasodilator           | 149955  | ENTRESTO <sup>a</sup>               | Angiotensin Receptor Blocker | 130561  |
| CHLORTHALIDONE                        | Thiazide diuretic            | 146081  | NIFEDIPINE ER                       | Calcium Channel Blocker      | 130015  |
| NIFEDIPINE ER                         | Calcium Channel Blocker      | 133191  | AMLODIP BES/BENAZ HCL               | Fixed dose combination       | 116515  |
| <b><i>Females, ≥75 years</i></b>      |                              |         | <b><i>Males, ≥75 years</i></b>      |                              |         |
| AMLODIPINE BESY                       | Calcium Channel Blocker      | 2234939 | AMLODIPINE BESY                     | Calcium Channel Blocker      | 1449233 |
| LOSARTAN POT                          | Angiotensin Receptor Blocker | 1591330 | LISINOPRIL                          | ACE inhibitor                | 1076944 |
| METOPROLOL SUCCIN                     | Beta Blocker                 | 1404260 | METOPROLOL SUCCIN                   | Beta Blocker                 | 1060242 |
| LISINOPRIL                            | ACE inhibitor                | 1269216 | LOSARTAN POT                        | Angiotensin Receptor Blocker | 953516  |
| FUROSEMIDE                            | Loop diuretic                | 988134  | FUROSEMIDE                          | Loop diuretic                | 682525  |
| HYDROCHLOROTHIAZIDE                   | Thiazide diuretic            | 854629  | CARVEDILOL                          | Beta Blocker                 | 504714  |
| METOPROLOL TART                       | Beta Blocker                 | 668455  | METOPROLOL TART                     | Beta Blocker                 | 480491  |
| CARVEDILOL                            | Beta Blocker                 | 596682  | HYDROCHLOROTHIAZIDE                 | Thiazide diuretic            | 468836  |

|                   |                              |        |                       |                              |        |
|-------------------|------------------------------|--------|-----------------------|------------------------------|--------|
| SPIRONOLACTONE    | Potassium sparing diuretic   | 349881 | SPIRONOLACTONE        | Potassium sparing diuretic   | 223277 |
| ATENOLOL          | Beta Blocker                 | 340267 | ATENOLOL              | Beta Blocker                 | 168322 |
| DILTIAZEM HCL     | Calcium Channel Blocker      | 281519 | HYDRALAZINE HCL       | Direct vasodilator           | 155522 |
| HYDRALAZINE HCL   | Direct vasodilator           | 245929 | LISINOPRIL/HCTZ       | Fixed dose combination       | 148794 |
| LOSARTAN POT/HCTZ | Fixed dose combination       | 230679 | DILTIAZEM HCL         | Calcium Channel Blocker      | 139858 |
| VALSARTAN         | Angiotensin Receptor Blocker | 214331 | VALSARTAN             | Angiotensin Receptor Blocker | 135762 |
| LISINOPRIL/HCTZ   | Fixed dose combination       | 200940 | DOXAZOSIN MESY        | Alpha-1 Blocker              | 130022 |
| OLMESARTAN MEDOX  | Angiotensin Receptor Blocker | 172875 | LOSARTAN POT/HCTZ     | Fixed dose combination       | 128480 |
| TRIAMTERENE/HCTZ  | Fixed dose combination       | 170304 | ENTRESTO <sup>a</sup> | Angiotensin Receptor Blocker | 112533 |
| NIFEDIPINE ER     | Calcium Channel Blocker      | 160854 | OLMESARTAN MEDOX      | Angiotensin Receptor Blocker | 100728 |
| CLONIDINE HCL     | Centrally acting             | 131841 | NIFEDIPINE ER         | Calcium Channel Blocker      | 97200  |
| PROPRANOLOL HCL   | Beta Blocker                 | 130104 | TORSEMIDE             | Loop diuretic                | 97184  |

<sup>a</sup>The therapeutic class reported is based on the antihypertensive component(s) of medications. Entresto (valsartan/sacubitril) is an Angiotensin Receptor Blocker/Neprilysin Inhibitor combination.
